# Supplementary material for: Distinct immune landscapes characterize highly versus minimally invasive brain metastases
Source: JCI journal article supplement (doi:10.1172/jci.insight.199498), 2026-05-22
Supplement: sd1 [file 1]

a

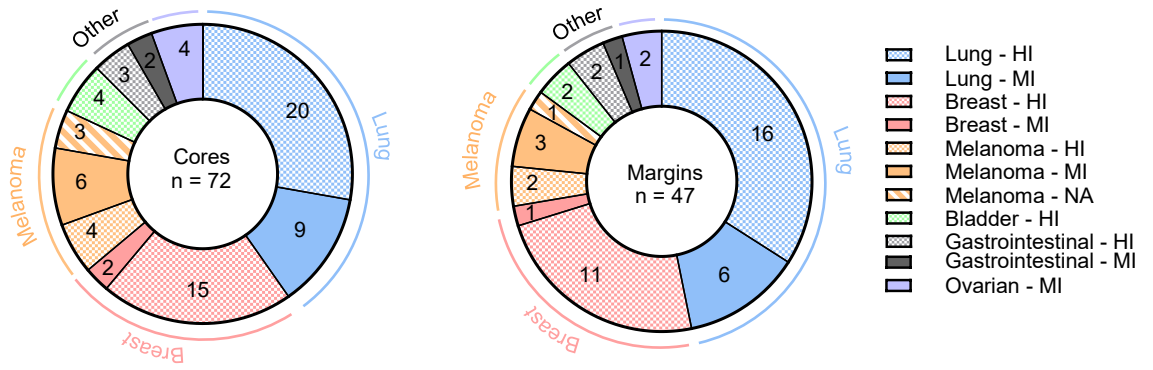

**b** Cell frequencies – All Primary sites

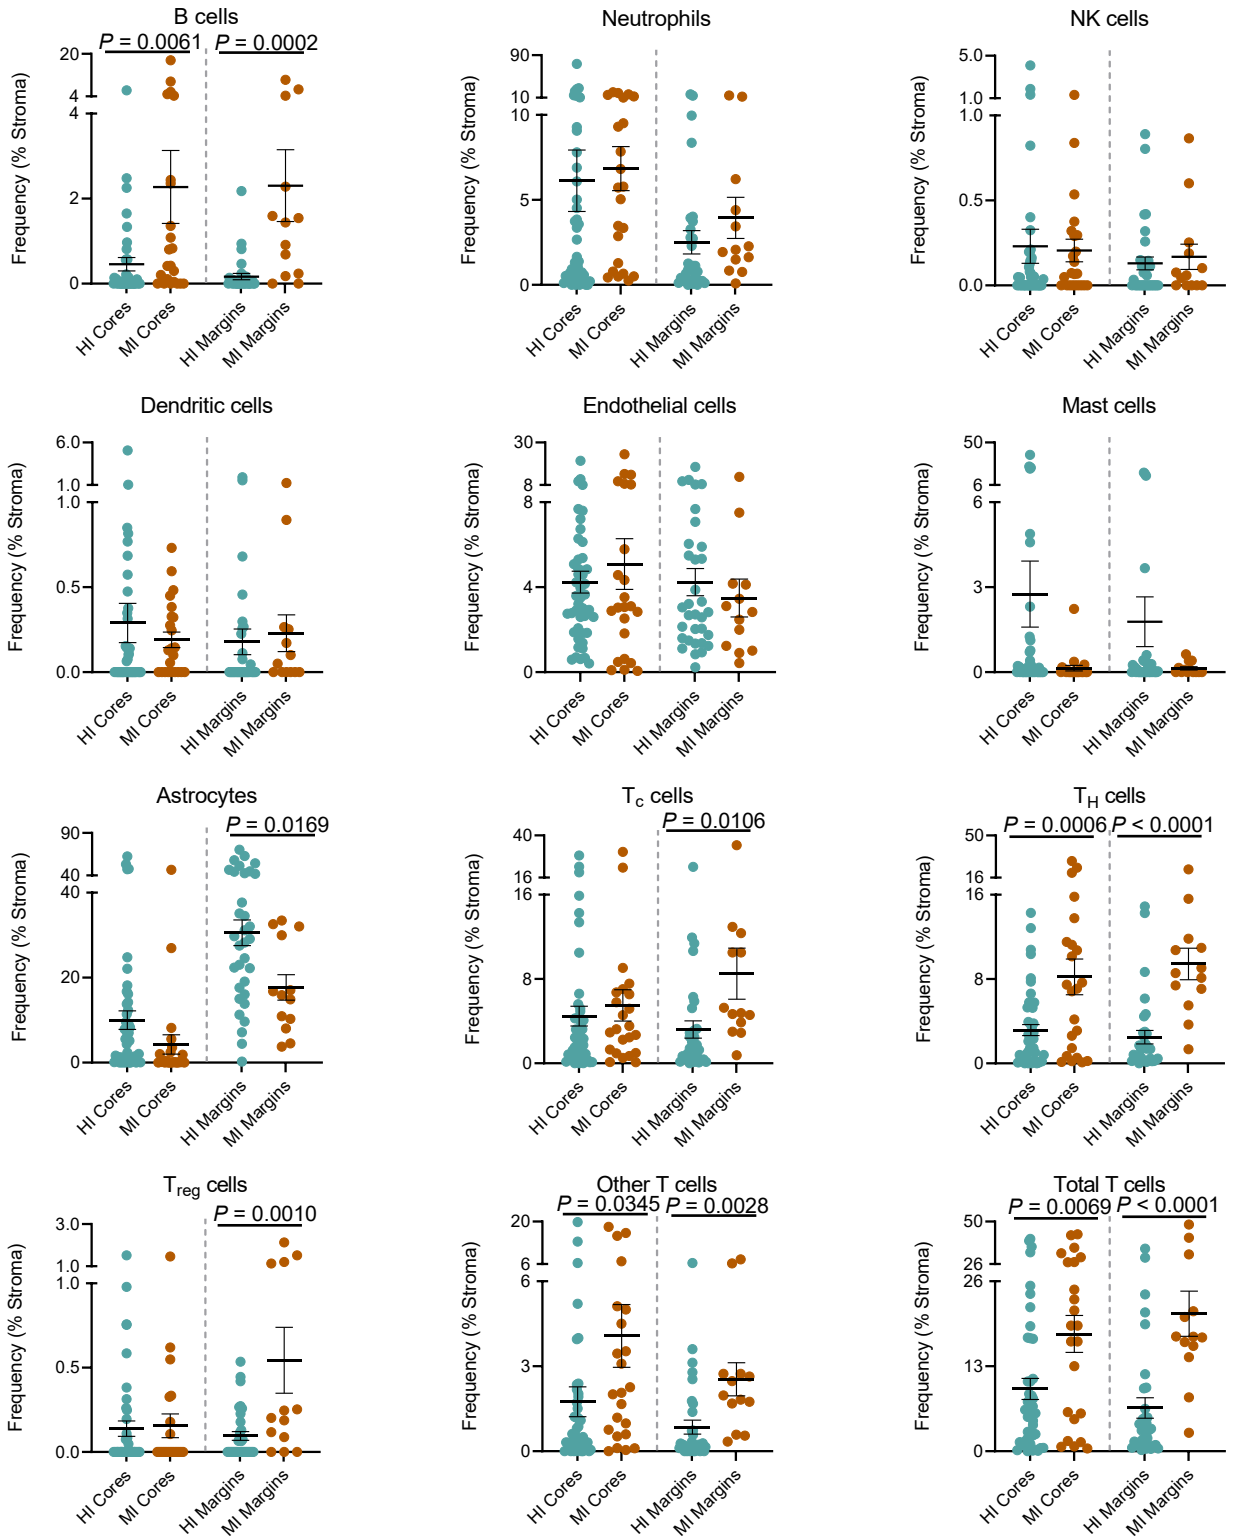

**b** Cell frequencies – All Primary sites

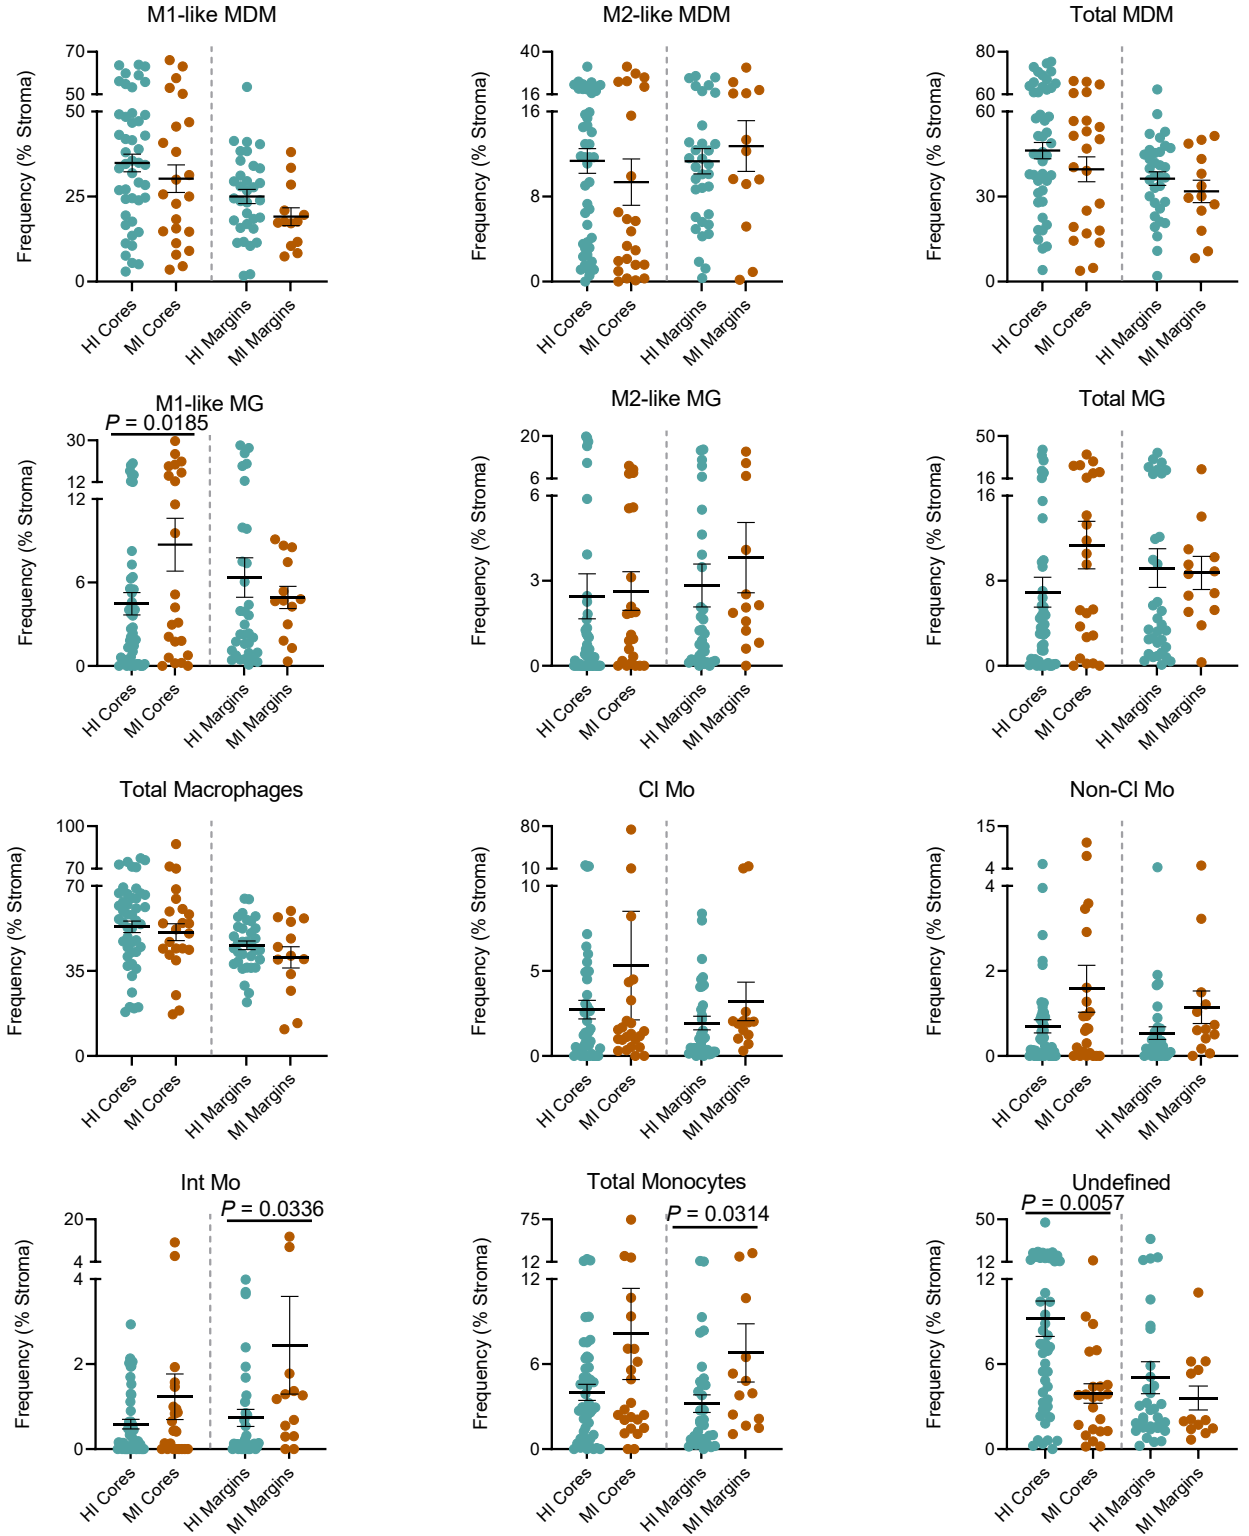

**C** Cell frequencies – Lung Only

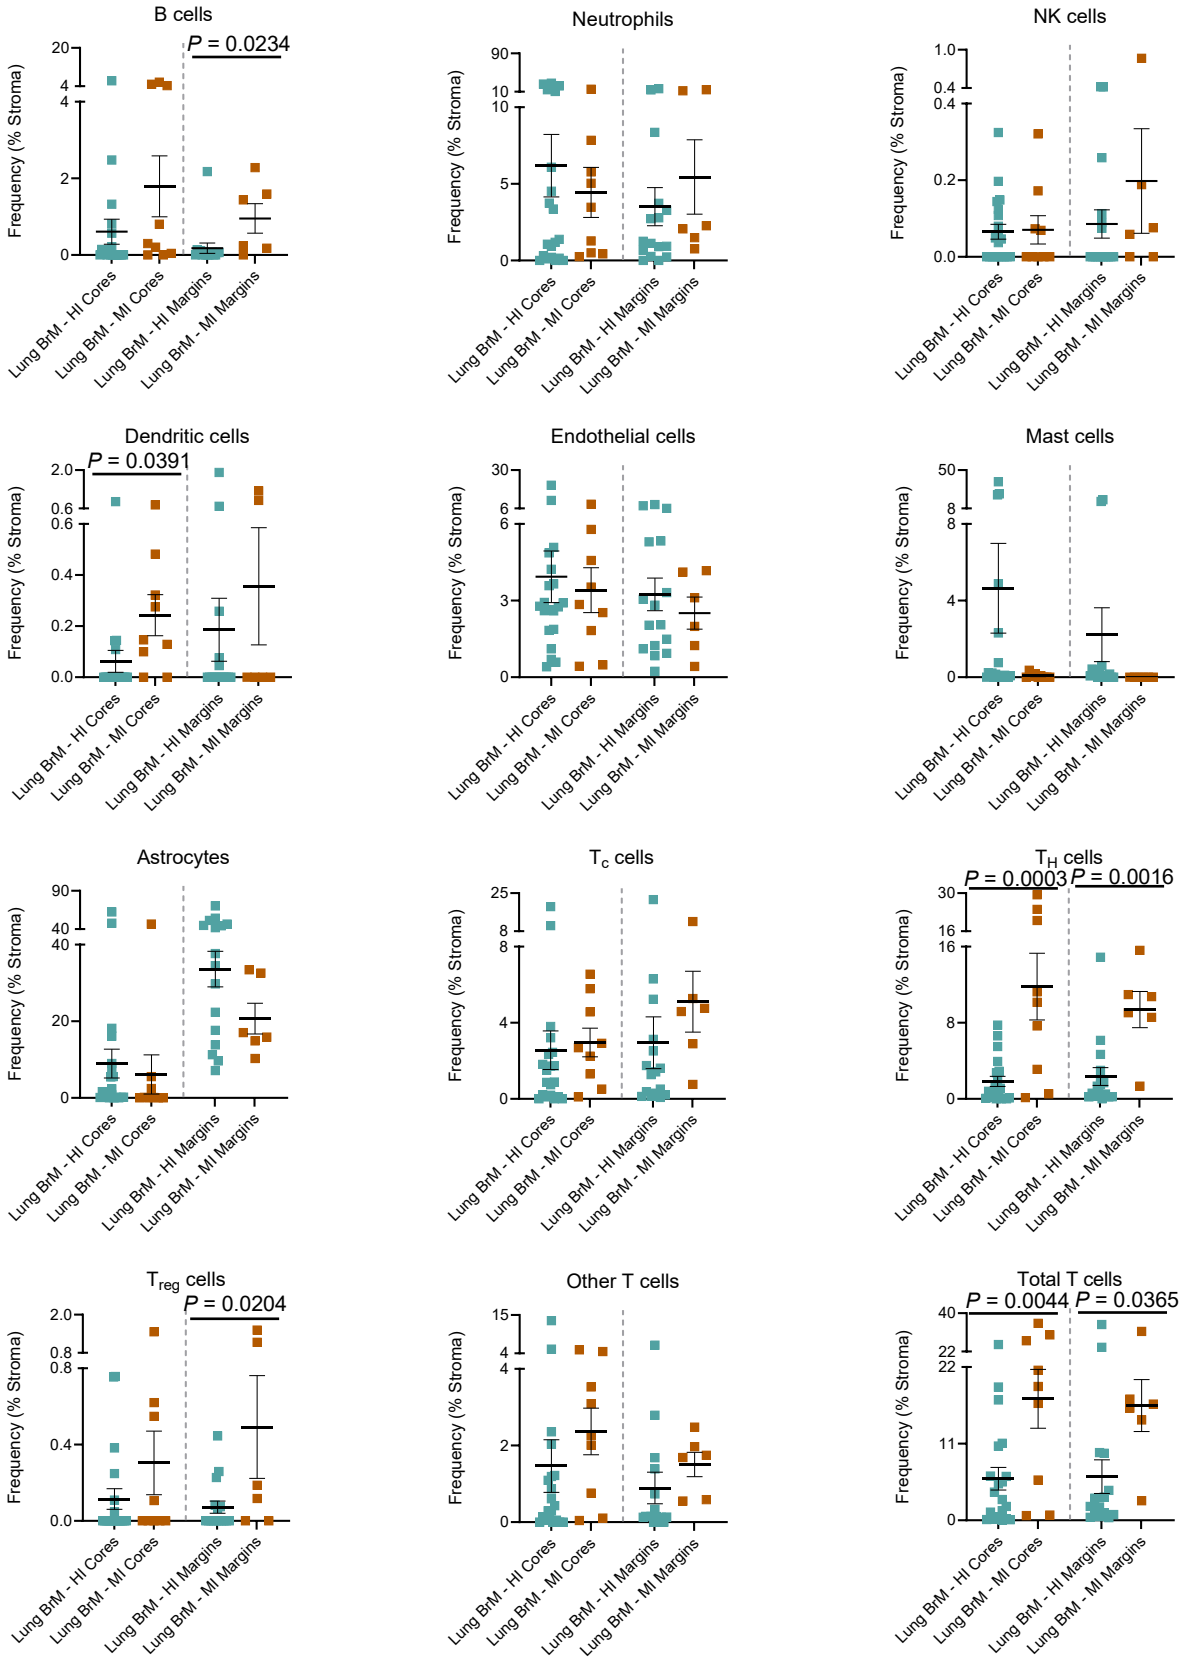

**C** Cell frequencies – Lung Only

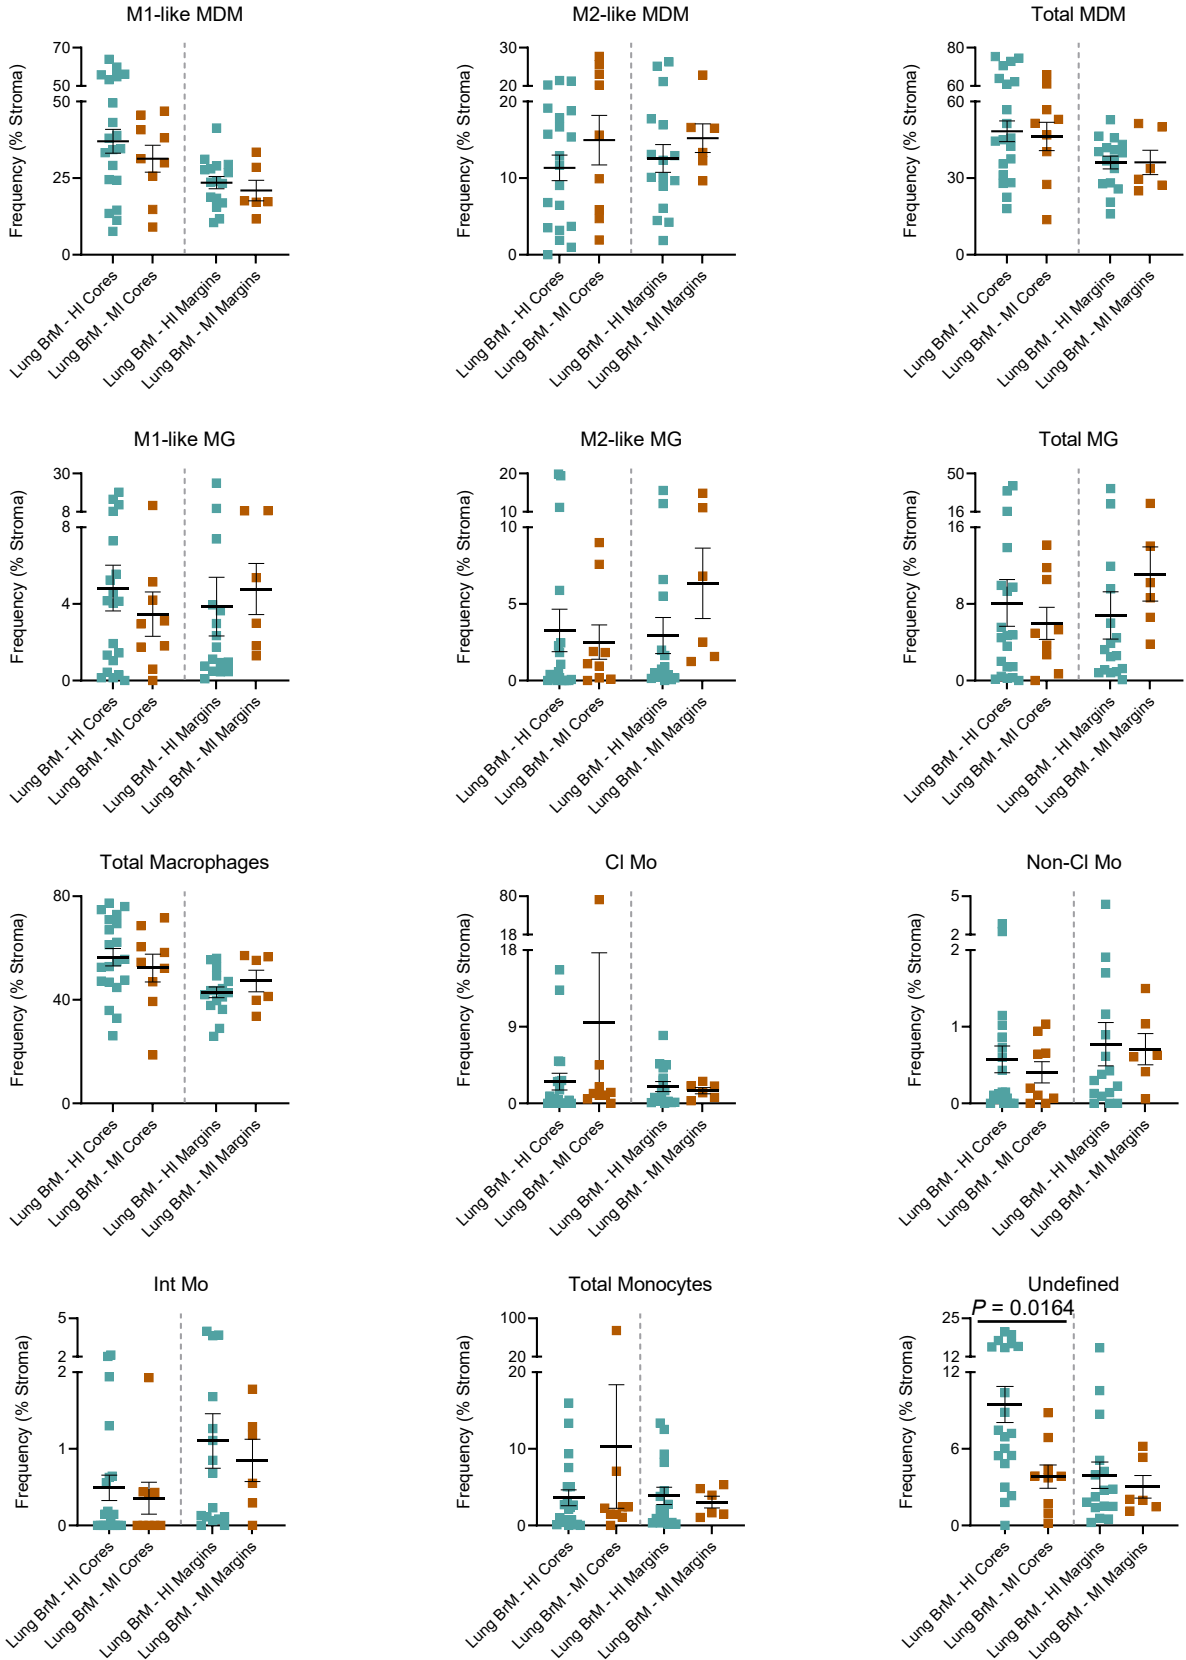

**Extended Data Fig. 1. Cell frequencies in highly and minimally invasive brain metastases as determined by imaging mass cytometry.** **a**, Distribution of human brain metastasis IMC images across primary sites and sampling regions (cores, *left*; margins, *right*). **b, c**, Cell frequency as a proportion of stroma in core and margin samples of HI and MI BrM from all primary sites (**b**) or lung cancer only (**c**). P values were calculated using Student's t test. P values less than 0.05 are shown.

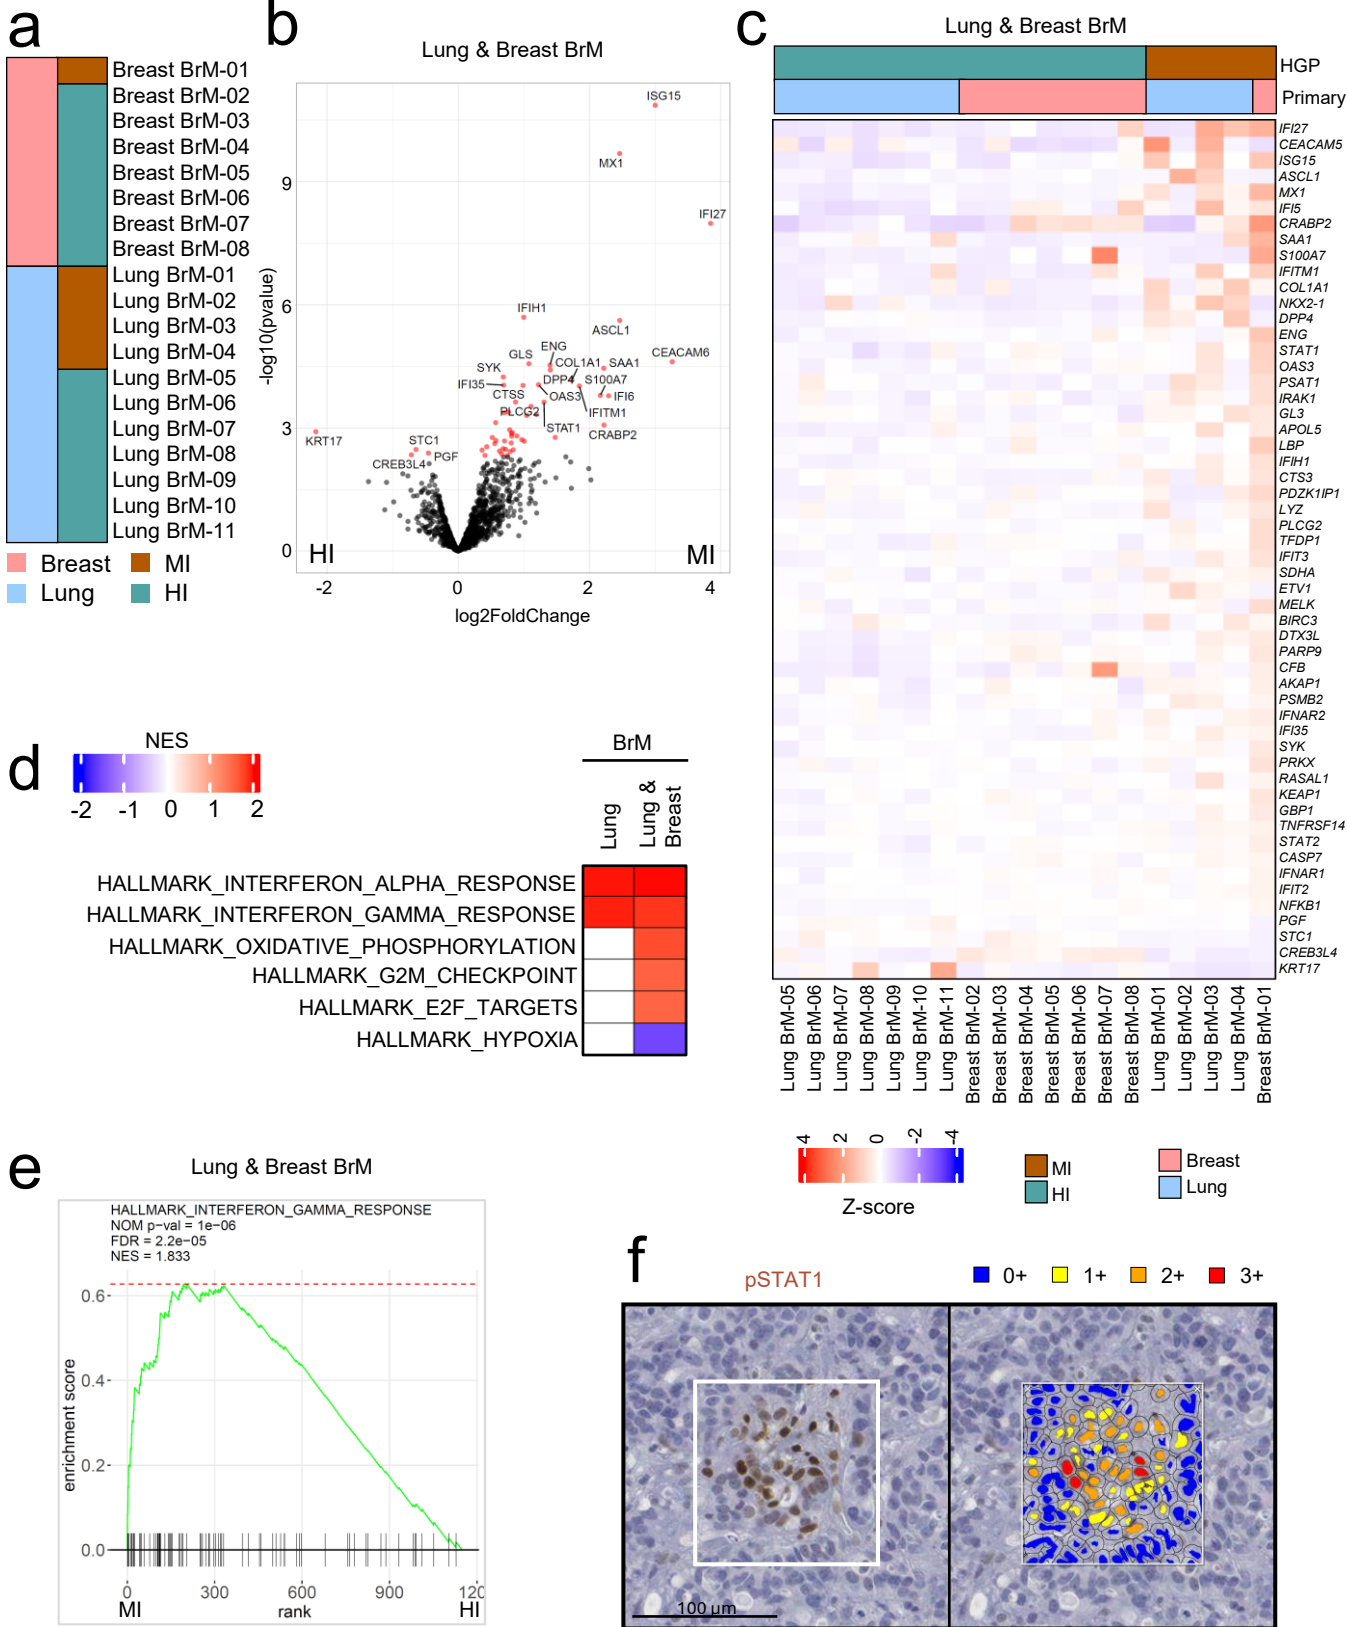

**Extended Data Fig. 2. Gene set enrichment analyses of minimally and highly invasive brain metastases.** **a**, Samples used in the Nanostring Digital Spatial Profiling analysis. Colour codes indicating primary type (breast, *pink*; lung, *light blue*) and histopathological growth pattern (highly invasive, HI, *blue*; minimally invasive, MI, *brown*) are shown. **b**, Volcano plot depicting differentially expressed genes (*red*,  $n = 54$ ) in MI versus highly invasive HI samples in the combined breast and lung cancer BrM cohort. Genes to the left of centre are upregulated in HI samples, while genes to the right of centre are upregulated in MI samples. **c**, Heatmap depicting normalized gene expression (Z-score of  $\log_{10}$  normalized gene counts) of differentially expressed genes ( $p_{adj} < 0.1$ ;  $n = 54$ ) in HI (*blue*) and MI (*brown*) BrM from the combined lung and breast cancer cohort. Primary site is depicted by colour (breast, *pink*; lung, *light blue*). **d**, Heatmap depicting normalized enrichment scores (NES) of gene set enrichment pathway analyses of the lung BrM cohort (*left column*) or combined lung and breast BrM cohort (*right column*). Pathways upregulated in MI samples relative to HI samples are shown in red; pathways downregulated in MI samples relative to HI samples are shown in blue. **e**, Gene set enrichment analysis enrichment plot for the IFN- $\gamma$  response pathway in the combined lung and breast cancer BrM cohort. **f**, Example of the algorithm used with HALO imaging analysis software to quantify pSTAT1 staining (*brown*) as 0+, 1+, 2+, or 3+. Scale bar: 100  $\mu\text{m}$ . **g**, Quantification of pSTAT1 staining (H-Score) in tumour cells in patient-matched core and margin regions of brain metastases from lung cancer ( $n = 8$  HI, 7 MI), corresponding to Fig. 2f. H-Scores were calculated by multiplying the staining intensity scores (0-3) by the percentage of positively stained tumour cells (1-100%) for a maximum H-Score of 300. For each patient tissue, 10 ROIs (200,000  $\mu\text{m}^2$  each) were captured at the brain-tumour interface and 10 ROIs were captured within the metastasis core (more than 1.5 mm distance from any brain-tumour interface). Margin:Core H-Score ratio was calculated per sample.

**Extended Data Table 1: Differentially expressed genes between HI and MI BrM in the lung cancer cohort**

| Gene Name       | log2FoldChange | pvalue   | padj     |
|-----------------|----------------|----------|----------|
| <i>IFI27</i>    | 3.876858       | 9.70E-07 | 6.29E-04 |
| <i>ISG15</i>    | 2.895673       | 1.24E-06 | 6.29E-04 |
| <i>ASCL1</i>    | 2.920815       | 1.37E-05 | 0.004413 |
| <i>MX1</i>      | 1.610491       | 1.74E-05 | 0.004413 |
| <i>CEACAM6</i>  | 3.761718       | 4.18E-05 | 0.0085   |
| <i>DPP4</i>     | 1.755709       | 6.19E-05 | 0.010486 |
| <i>IFI6</i>     | 2.64077        | 7.25E-05 | 0.010528 |
| <i>ETV4</i>     | 0.84124        | 2.52E-04 | 0.028571 |
| <i>S100A9</i>   | -3.76918       | 2.53E-04 | 0.028571 |
| <i>COL1A1</i>   | 1.985331       | 3.59E-04 | 0.033711 |
| <i>ETV1</i>     | 1.109145       | 3.65E-04 | 0.033711 |
| <i>PCK2</i>     | 0.783302       | 5.34E-04 | 0.045198 |
| <i>KRT17</i>    | -3.02117       | 5.99E-04 | 0.046848 |
| <i>IRF7</i>     | 1.063213       | 6.81E-04 | 0.049389 |
| <i>SERPINA1</i> | 2.091756       | 8.81E-04 | 0.059666 |
| <i>GDF15</i>    | 1.540682       | 0.001097 | 0.069645 |
| <i>KRT5</i>     | -3.14179       | 0.00129  | 0.077071 |
| <i>FBP1</i>     | 0.627775       | 0.001388 | 0.078356 |
| <i>AREG</i>     | 1.674199       | 0.001936 | 0.099084 |
| <i>IFI35</i>    | 0.648216       | 0.00195  | 0.099084 |
| <i>IFIH1</i>    | 0.705292       | 0.002063 | 0.099806 |

**Extended Data Table 2: Differentially expressed genes between HI and MI BrM in the combined lung and breast cancer cohort**

| Gene Name | log2FoldChange | pvalue   | padj     |
|-----------|----------------|----------|----------|
| ISG15     | 3.002245       | 1.37E-11 | 1.58E-08 |
| MX1       | 2.459778       | 2.08E-10 | 1.19E-07 |
| IFI27     | 3.846451       | 1.05E-08 | 4.02E-06 |
| ASCL1     | 2.461451       | 2.44E-06 | 5.60E-04 |
| IFIH1     | 0.99823        | 2.04E-06 | 5.60E-04 |
| CEACAM6   | 3.261666       | 2.44E-05 | 0.004245 |
| ENG       | 1.398461       | 2.96E-05 | 0.004245 |
| GLS       | 1.077553       | 2.71E-05 | 0.004245 |
| DPP4      | 1.403544       | 3.85E-05 | 0.004424 |
| SAA1      | 2.218098       | 3.51E-05 | 0.004424 |
| SYK       | 0.686756       | 5.72E-05 | 0.005974 |
| COL1A1    | 1.731846       | 6.82E-05 | 0.006523 |
| CTSS      | 0.986682       | 9.21E-05 | 0.006808 |
| IFI35     | 0.693142       | 9.06E-05 | 0.006808 |
| IFITM1    | 1.846059       | 9.49E-05 | 0.006808 |
| OAS3      | 1.223266       | 8.84E-05 | 0.006808 |
| IFI6      | 2.292136       | 1.64E-04 | 0.010477 |
| S100A7    | 2.165966       | 1.61E-04 | 0.010477 |
| PLCG2     | 0.873468       | 2.33E-04 | 0.013479 |
| STAT1     | 1.308241       | 2.35E-04 | 0.013479 |
| IRAK1     | 1.109771       | 2.98E-04 | 0.01627  |
| IFNAR2    | 0.701419       | 4.29E-04 | 0.021401 |
| PARP9     | 0.767066       | 4.12E-04 | 0.021401 |
| PSAT1     | 1.192084       | 4.70E-04 | 0.022475 |
| APOL6     | 1.044335       | 4.95E-04 | 0.022717 |
| TNFRSF14  | 0.570138       | 7.42E-04 | 0.032782 |
| CRABP2    | 2.22146        | 8.49E-04 | 0.036116 |
| DTX3L     | 0.783782       | 0.00111  | 0.045494 |
| KRT17     | -2.17063       | 0.001233 | 0.048792 |
| IFIT3     | 0.824951       | 0.001306 | 0.049971 |
| ETV1      | 0.811146       | 0.001369 | 0.050713 |
| LYZ       | 0.894689       | 0.001563 | 0.055327 |
| SDHA      | 0.815098       | 0.00159  | 0.055327 |
| CASP7     | 0.519204       | 0.00171  | 0.056103 |
| NKX2-1    | 1.477607       | 0.001695 | 0.056103 |
| PDZK1IP1  | 0.967404       | 0.00193  | 0.061549 |
| GBP1      | 0.573985       | 0.002022 | 0.061919 |
| LBP       | 1.006525       | 0.002104 | 0.061919 |
| PSMB2     | 0.70609        | 0.002078 | 0.061919 |
| MELK      | 0.807237       | 0.002319 | 0.066565 |
| STAT2     | 0.55643        | 0.002403 | 0.067274 |
| IFNAR1    | 0.434754       | 0.002871 | 0.078486 |
| AKAP1     | 0.721859       | 0.00333  | 0.084829 |
| NFKB1     | 0.363811       | 0.003473 | 0.084829 |
| PRKX      | 0.684084       | 0.003198 | 0.084829 |
| STC1      | -0.64358       | 0.003356 | 0.084829 |
| TFDP1     | 0.838522       | 0.00341  | 0.084829 |
| KEAP1     | 0.629455       | 0.003652 | 0.087332 |
| BIRC3     | 0.790514       | 0.003754 | 0.087959 |
| PGF       | -0.45453       | 0.004087 | 0.093831 |
| RASAL1    | 0.661416       | 0.004319 | 0.097221 |
| CREB3L4   | -0.71431       | 0.004516 | 0.099705 |
| CFB       | 0.747041       | 0.004703 | 0.099978 |
| IFIT2     | 0.407551       | 0.004675 | 0.099978 |

**Extended Data Table 3: Gene set enrichment analyses of MI and HI BrM**

| Lung BrM Cohort                            |          |          |          |          |
|--------------------------------------------|----------|----------|----------|----------|
| Pathway                                    | pval     | padj     | ES       | NES      |
| HALLMARK_INTERFERON_ALPHA_RESPONSE         | 2.68E-05 | 0.000469 | 0.718023 | 1.965227 |
| HALLMARK_INTERFERON_GAMMA_RESPONSE         | 4.55E-06 | 0.000159 | 0.630427 | 1.933621 |
| HALLMARK_OXIDATIVE_PHOSPHORYLATION         | 0.033329 | 0.233304 | 0.544538 | 1.490398 |
| HALLMARK_UV_RESPONSE_UP                    | 0.094894 | 0.416954 | 0.490129 | 1.348916 |
| HALLMARK_XENOBIOTIC_METABOLISM             | 0.109881 | 0.416954 | 0.536793 | 1.347462 |
| HALLMARK_MYC_TARGETS_V1                    | 0.130395 | 0.416954 | 0.493244 | 1.309212 |
| HALLMARK_ALLOGRAFT_REJECTION               | 0.126885 | 0.416954 | 0.42529  | 1.270277 |
| HALLMARK_G2M_CHECKPOINT                    | 0.14342  | 0.418307 | 0.410107 | 1.248209 |
| HALLMARK_TNFA_SIGNALING_VIA_NFKB           | 0.176415 | 0.474965 | 0.388246 | 1.206156 |
| HALLMARK_IL6_JAK_STAT3_SIGNALING           | 0.240206 | 0.56048  | 0.419648 | 1.178757 |
| HALLMARK_E2F_TARGETS                       | 0.235414 | 0.56048  | 0.385794 | 1.164328 |
| HALLMARK_ESTROGEN_RESPONSE_EARLY           | 0.360313 | 0.663734 | 0.404987 | 1.089511 |
| HALLMARK_APOPTOSIS                         | 0.355121 | 0.663734 | 0.357768 | 1.077071 |
| HALLMARK_ANDROGEN_RESPONSE                 | 0.467474 | 0.779123 | 0.429664 | 1.015728 |
| HALLMARK_UV_RESPONSE_DN                    | 0.456685 | 0.779123 | 0.370678 | 1.014545 |
| HALLMARK_COAGULATION                       | 0.541175 | 0.811565 | 0.35549  | 0.95635  |
| HALLMARK_ESTROGEN_RESPONSE_LATE            | 0.602877 | 0.811565 | 0.323494 | 0.916755 |
| HALLMARK_NOTCH_SIGNALING                   | 0.598063 | 0.811565 | 0.380392 | 0.91078  |
| HALLMARK_KRAS_SIGNALING_UP                 | 0.647805 | 0.835056 | 0.311321 | 0.889742 |
| HALLMARK_WNT_BETA_CATENIN_SIGNALING        | 0.677684 | 0.835056 | 0.344193 | 0.855113 |
| HALLMARK_DNA_REPAIR                        | 0.691903 | 0.835056 | 0.328617 | 0.847814 |
| HALLMARK_P53_PATHWAY                       | 0.744739 | 0.844597 | 0.288111 | 0.826197 |
| HALLMARK_ADIPOGENESIS                      | 0.748071 | 0.844597 | 0.316894 | 0.802418 |
| HALLMARK_GLYCOLYSIS                        | 0.819935 | 0.896804 | 0.268087 | 0.771326 |
| HALLMARK_INFLAMMATORY_RESPONSE             | 0.897665 | 0.924067 | 0.240089 | 0.712965 |
| HALLMARK_MITOTIC_SPINDLE                   | 0.886505 | 0.924067 | 0.25983  | 0.681048 |
| HALLMARK_PI3K_AKT_MTOR_SIGNALING           | 0.971361 | 0.971361 | 0.205713 | 0.58991  |
| HALLMARK_MTORC1_SIGNALING                  | 0.601725 | 0.811565 | -0.26177 | -0.91787 |
| HALLMARK_IL2_STAT5_SIGNALING               | 0.514365 | 0.811565 | -0.26806 | -0.96783 |
| HALLMARK_APICAL_JUNCTION                   | 0.341628 | 0.663734 | -0.30014 | -1.06366 |
| HALLMARK_UNFOLDED_PROTEIN_RESPONSE         | 0.279751 | 0.611955 | -0.41761 | -1.15651 |
| HALLMARK_MYOGENESIS                        | 0.131043 | 0.416954 | -0.44426 | -1.31973 |
| HALLMARK_HYPOXIA                           | 0.045191 | 0.263615 | -0.37421 | -1.39864 |
| HALLMARK_COMPLEMENT                        | 0.03245  | 0.233304 | -0.40899 | -1.46363 |
| HALLMARK_EPITHELIAL_MESENCHYMAL_TRANSITION | 0.025132 | 0.233304 | -0.39994 | -1.48287 |
| Lung and Breast BrM Combined Cohort        |          |          |          |          |
| Pathway                                    | pval     | padj     | ES       | NES      |
| HALLMARK_INTERFERON_ALPHA_RESPONSE         | 4.80E-07 | 1.25E-05 | 0.719883 | 1.990726 |
| HALLMARK_INTERFERON_GAMMA_RESPONSE         | 6.77E-07 | 1.25E-05 | 0.627532 | 1.8433   |
| HALLMARK_OXIDATIVE_PHOSPHORYLATION         | 0.001355 | 0.016715 | 0.629864 | 1.692706 |
| HALLMARK_G2M_CHECKPOINT                    | 0.00204  | 0.018866 | 0.531159 | 1.547121 |
| HALLMARK_E2F_TARGETS                       | 0.004514 | 0.031425 | 0.530903 | 1.529242 |
| HALLMARK_MYC_TARGETS_V1                    | 0.057642 | 0.236971 | 0.536487 | 1.405106 |
| HALLMARK_UV_RESPONSE_UP                    | 0.053097 | 0.236971 | 0.510891 | 1.38757  |
| HALLMARK_COAGULATION                       | 0.103319 | 0.347528 | 0.488813 | 1.317974 |
| HALLMARK_ALLOGRAFT_REJECTION               | 0.099327 | 0.347528 | 0.436111 | 1.270272 |
| HALLMARK_ESTROGEN_RESPONSE_LATE            | 0.165723 | 0.49647  | 0.439404 | 1.228477 |
| HALLMARK_MITOTIC_SPINDLE                   | 0.211647 | 0.559352 | 0.466597 | 1.215917 |
| HALLMARK_COMPLEMENT                        | 0.174435 | 0.49647  | 0.427053 | 1.213308 |
| HALLMARK_XENOBIOTIC_METABOLISM             | 0.302253 | 0.602912 | 0.445361 | 1.145119 |
| HALLMARK_IL6_JAK_STAT3_SIGNALING           | 0.286858 | 0.602912 | 0.412869 | 1.141727 |
| HALLMARK_ADIPOGENESIS                      | 0.309603 | 0.602912 | 0.444989 | 1.137008 |
| HALLMARK_TNFA_SIGNALING_VIA_NFKB           | 0.309546 | 0.602912 | 0.373974 | 1.100839 |
| HALLMARK_ESTROGEN_RESPONSE_EARLY           | 0.357816 | 0.630437 | 0.406634 | 1.096397 |
| HALLMARK_P53_PATHWAY                       | 0.390946 | 0.6575   | 0.380583 | 1.069444 |
| HALLMARK_APOPTOSIS                         | 0.423427 | 0.675459 | 0.360342 | 1.045037 |
| HALLMARK_KRAS_SIGNALING_UP                 | 0.438136 | 0.675459 | 0.368396 | 1.041331 |
| HALLMARK_DNA_REPAIR                        | 0.491087 | 0.726809 | 0.392352 | 1.002515 |
| HALLMARK_ANDROGEN_RESPONSE                 | 0.545935 | 0.751496 | 0.409182 | 0.963138 |
| HALLMARK_INFLAMMATORY_RESPONSE             | 0.59845  | 0.751496 | 0.33218  | 0.946444 |
| HALLMARK_KRAS_SIGNALING_DN                 | 0.604834 | 0.751496 | 0.390144 | 0.918327 |
| HALLMARK_MTORC1_SIGNALING                  | 0.63522  | 0.751496 | 0.328288 | 0.917822 |
| HALLMARK_UV_RESPONSE_DN                    | 0.632749 | 0.751496 | 0.338347 | 0.915512 |
| HALLMARK_PI3K_AKT_MTOR_SIGNALING           | 0.661404 | 0.751496 | 0.319932 | 0.902525 |
| HALLMARK_UNFOLDED_PROTEIN_RESPONSE         | 0.645078 | 0.751496 | 0.375908 | 0.884819 |
| HALLMARK_NOTCH_SIGNALING                   | 0.670253 | 0.751496 | 0.360099 | 0.867292 |
| HALLMARK_WNT_BETA_CATENIN_SIGNALING        | 0.724115 | 0.788007 | 0.332488 | 0.827847 |
| HALLMARK_TGF_BETA_SIGNALING                | 0.7784   | 0.82288  | 0.324994 | 0.774428 |
| HALLMARK_MYOGENESIS                        | 0.812262 | 0.834825 | 0.296319 | 0.751061 |
| HALLMARK_GLYCOLYSIS                        | 0.910227 | 0.910227 | 0.243924 | 0.679419 |
| HALLMARK_IL2_STAT5_SIGNALING               | 0.351648 | 0.630437 | -0.23542 | -1.07023 |
| HALLMARK_APICAL_JUNCTION                   | 0.292208 | 0.602912 | -0.24538 | -1.09561 |
| HALLMARK_EPITHELIAL_MESENCHYMAL_TRANSITION | 0.048851 | 0.236971 | -0.2894  | -1.33195 |
| HALLMARK_HYPOXIA                           | 0.005096 | 0.031425 | -0.33848 | -1.59391 |

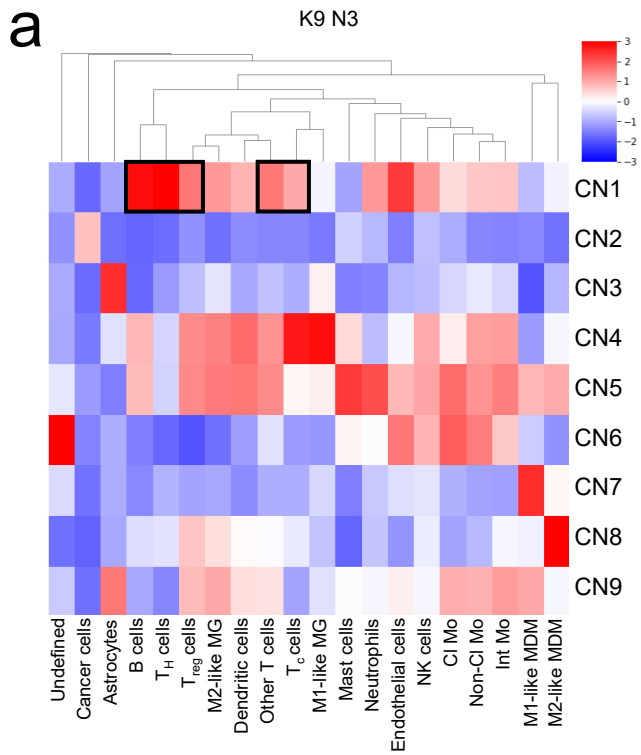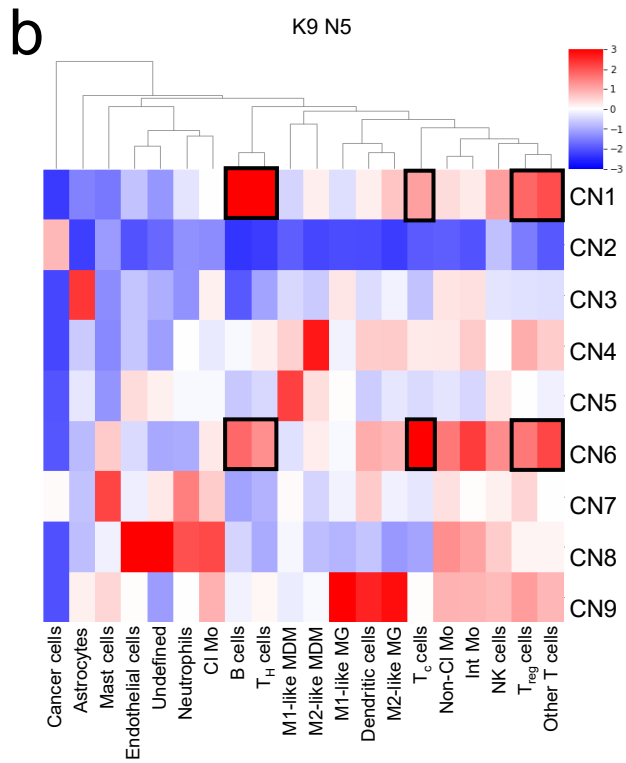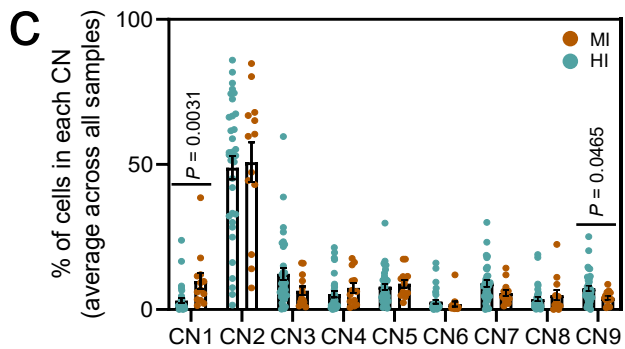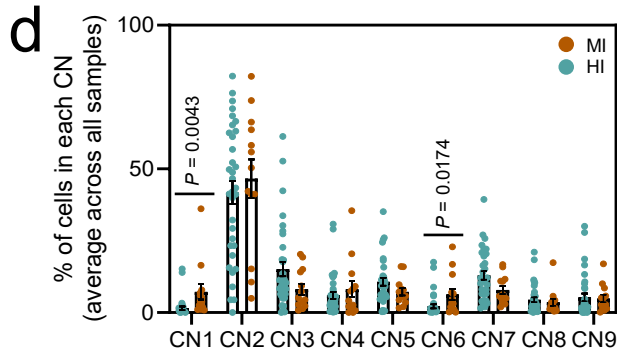

**e**

K30 N10

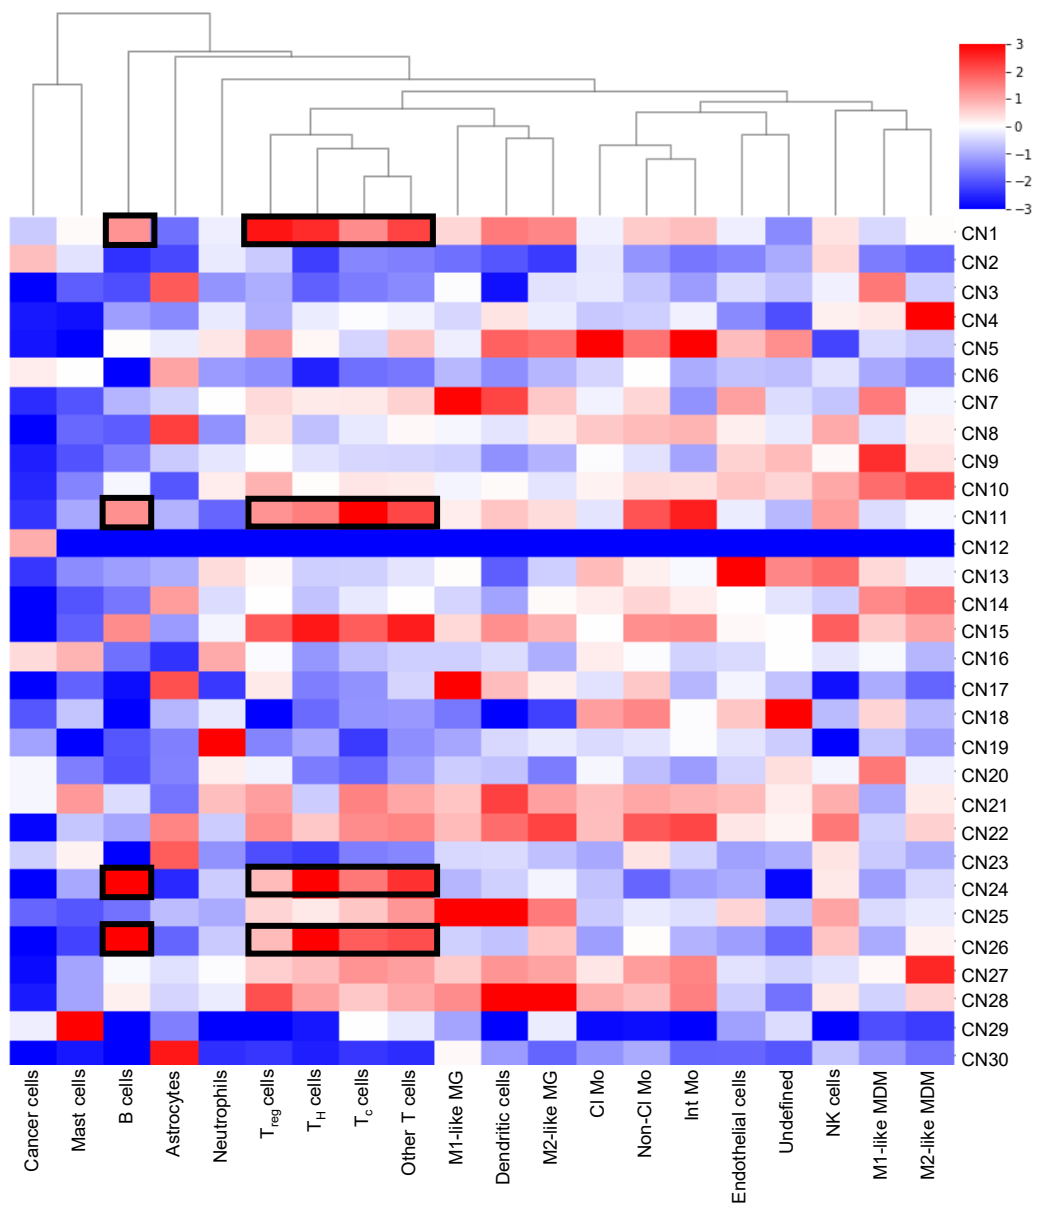**f**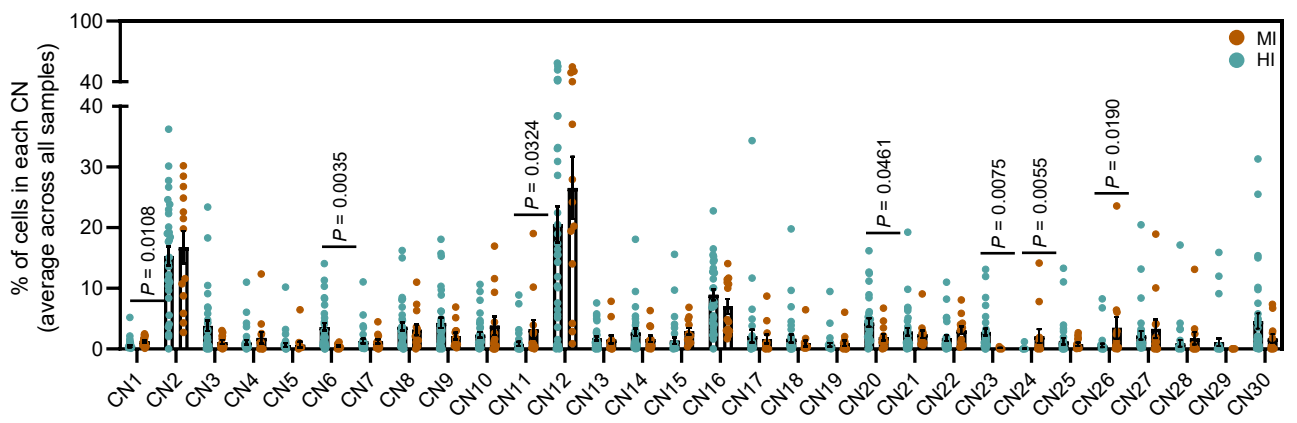

**Extended Data Fig. 3. Cellular neighbourhood analyses of brain metastasis margins with modified neighbourhood parameters.** **a, b,** Heatmap of cell type distribution across 9 cellular neighbourhoods (CN) in BrM margins (n = 47 images) using either  $N = 3$  (**a**) or  $N = 5$  (**b**) nearest neighbours. Boxes highlight cell types of interest. **c, d,** Bar graph depicting percentage of cells in each CN across HI (*blue*, n = 34 images) and MI (*brown*, n = 13 images) BrM margins, for CNs calculated with  $N = 3$  (**c**) or  $N = 5$  (**d**) nearest neighbours. P values were calculated using Student's t test. **e,** Heatmap of cell type distribution across 30 CNs in BrM margins (n = 47 images) using  $N = 10$  nearest neighbours. Boxes highlight cell types of interest. **f,** Bar graph depicting percentage of cells in each CN (K30, N10) across HI (*blue*, n = 34 images) and MI (*brown*, n = 13 images) BrM margins. P values were calculated using Student's t test.

**Extended Data Table 4: Significant pairwise interaction and avoidance behaviours between cell types in MI (brown) and HI (blue) BrM**

| Interaction                                   | P value  | Interaction Score (MI) | Interaction Score (HI) |
|-----------------------------------------------|----------|------------------------|------------------------|
| Cancer - Cl Mo                                | 0.0406   | 31758.7692             | 16908.2647             |
| B cells - B cells                             | 0.0003   | 34333.6154             | 8576.5588              |
| B cells - T <sub>c</sub> cells                | 0.0022   | 32331.5385             | 10522.6176             |
| B cells - T <sub>H</sub> cells                | 0.0001   | 33772.5385             | 7858.1765              |
| B cells - M1-like MDM                         | 0.0001   | 27305.6923             | 4266.3529              |
| B cells - M2-like MDM                         | 0.0051   | 28212.6923             | 9736.7941              |
| Endothelial cells - Other T cells             | 0.0151   | 26879.0769             | 10232.4706             |
| Astrocytes - T <sub>c</sub> cells             | 0.0053   | 35778.3077             | 17120.3235             |
| T <sub>c</sub> cells - B cells                | 0.0079   | 28722.9231             | 10382.4412             |
| T <sub>c</sub> - Endothelial cells            | 0.0196   | 27378.2308             | 11232.6176             |
| T <sub>c</sub> cells - T <sub>c</sub> cells   | 0.0217   | 44885.4615             | 29396.6176             |
| T <sub>c</sub> cells - T <sub>H</sub> cells   | 0.0042   | 42473.7692             | 21658.0882             |
| T <sub>c</sub> cells - Other T cells          | 0.0220   | 34991.3846             | 17937.4412             |
| T <sub>c</sub> cells - M1-like MDM            | 0.0196   | 41140.9231             | 24827.5000             |
| T <sub>c</sub> cells - M1-like MG             | 0.0025   | 33086.8462             | 11856.0588             |
| T <sub>c</sub> cells - M2-like MG             | 0.0191   | 29380.0769             | 12892.9118             |
| T <sub>H</sub> cells - Cancer                 | 0.0343   | 27333.9231             | 11745.8824             |
| T <sub>H</sub> cells - B cells                | 0.0001   | 33663.0000             | 7551.0294              |
| T <sub>H</sub> cells - Endothelial cells      | 0.0111   | 31652.6923             | 14270.8235             |
| T <sub>H</sub> cells - Astrocytes             | 0.0283   | 29393.7692             | 13522.5294             |
| T <sub>H</sub> cells - T <sub>c</sub> cells   | 0.0009   | 47440.9231             | 23758.9412             |
| T <sub>H</sub> cells - T <sub>H</sub> cells   | 0.0015   | 49544.8462             | 27258.5588             |
| T <sub>H</sub> cells - T <sub>reg</sub> cells | 0.0004   | 27448.9231             | 5624.0588              |
| T <sub>H</sub> cells - Other T cells          | 0.0000   | 45676.5385             | 13374.5294             |
| T <sub>H</sub> cells - M1-like MDM            | 0.0000   | 49259.3077             | 20103.4118             |
| T <sub>H</sub> cells - M2-like MDM            | 0.0004   | 48158.4615             | 24540.5000             |
| T <sub>H</sub> cells - Cl Mo                  | 0.0002   | 26971.0769             | 4907.6471              |
| Other T cells - Endothelial cells             | 0.0001   | 26474.3077             | 4780.0882              |
| Other T cells - T <sub>H</sub> cells          | 0.0007   | 37462.4615             | 13235.4118             |
| Other T cells - M2-like MDM                   | 0.0212   | 26656.2308             | 11447.8529             |
| M1-like MDM - T <sub>H</sub> cells            | 0.0305   | 40202.4615             | 25309.6176             |
| M1-like MDM - Other T cells                   | 0.0493   | 27713.7692             | 15482.6765             |
| M1-like MDM - Cl Mo                           | 0.0101   | 35135.0769             | 18967.4118             |
| M2-like MDM - Cancer                          | 0.0267   | 12728.1538             | 28785.8529             |
| M2-like MDM - B cells                         | 0.0186   | 27294.7692             | 11652.2353             |
| M2-like MG - Cancer                           | 0.0000   | 25383.9231             | 965.7647               |
| M2-like MG - Astrocytes                       | 0.0111   | 28189.0000             | 10880.4412             |
| Avoidance                                     | P value  | Avoidance Score (MI)   | Avoidance Score (HI)   |
| M1-like MG - Cancer                           | 0.013702 | 30471.2308             | 14814.2059             |

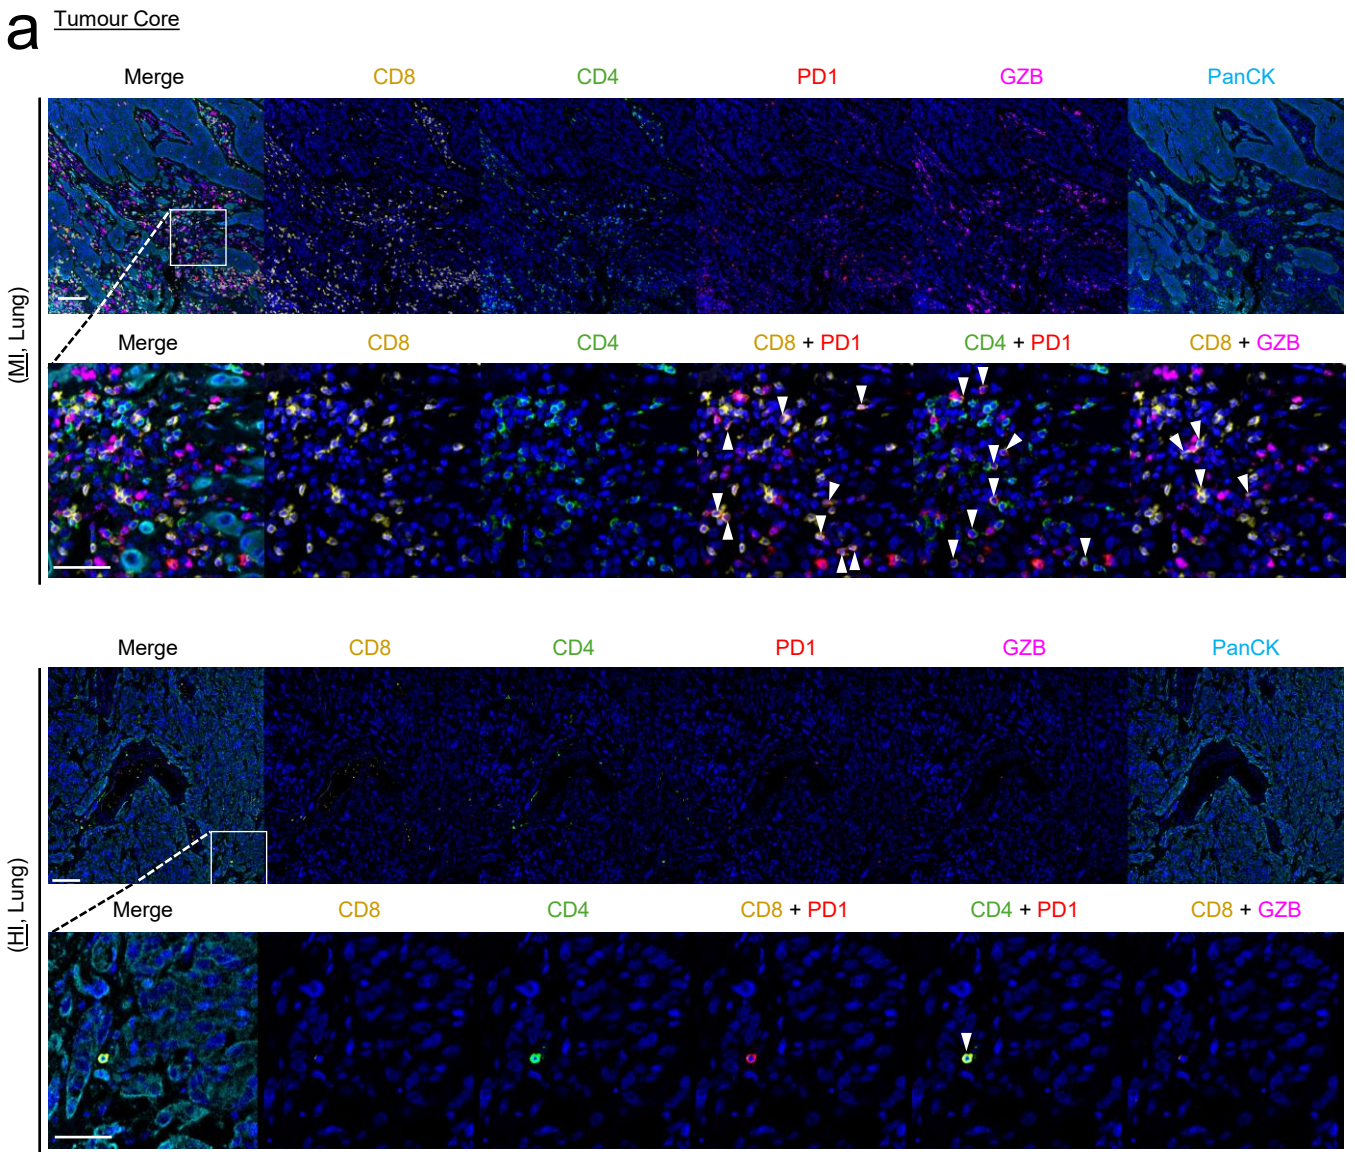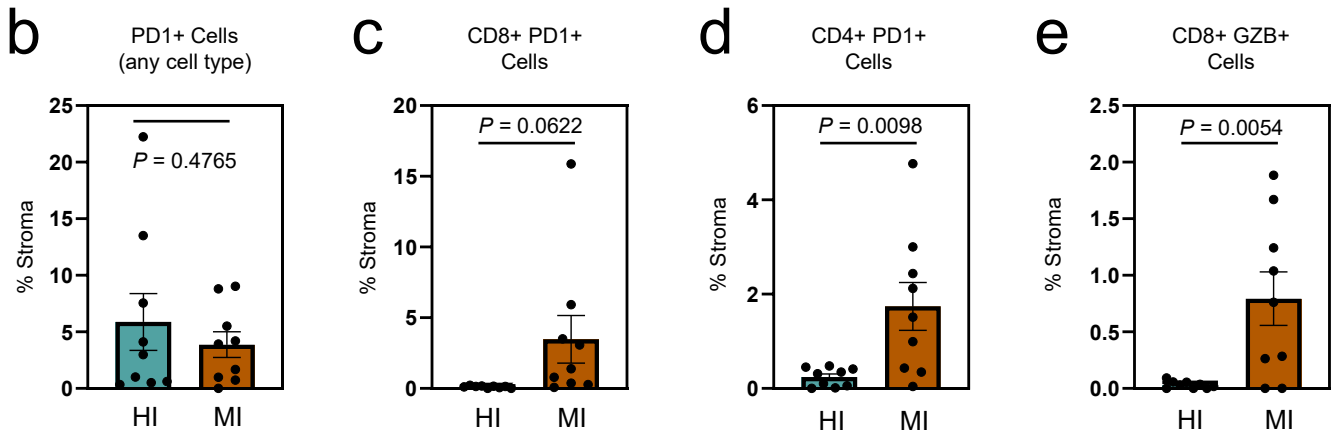

**Extended Data Fig. 4. Multiplex immunohistofluorescence (IHF) staining of lung cancer brain metastasis cores.** **a**, Representative IHF staining for CD8 (yellow), CD4 (green), PD1 (red), granzyme B (GZB, pink) and pan cytokeratin (PanCK, cyan) in tumour cores of minimally invasive (MI, *top*) and highly invasive (HI, *bottom*) lung cancer brain metastasis patient samples. Scale bars: 100  $\mu\text{m}$  (*low magnification*), 50  $\mu\text{m}$  (*high magnification*). **b-e**, Quantification of PD1<sup>+</sup> (**b**), CD8<sup>+</sup> PD1<sup>+</sup> (**c**), CD4<sup>+</sup> PD1<sup>+</sup> (**d**), or CD8<sup>+</sup> GZB<sup>+</sup> (**e**) cells as a percentage of stroma (PanCK<sup>-</sup> cells) in HI and MI BrM samples. P-values were calculated using Student's *t*-test.

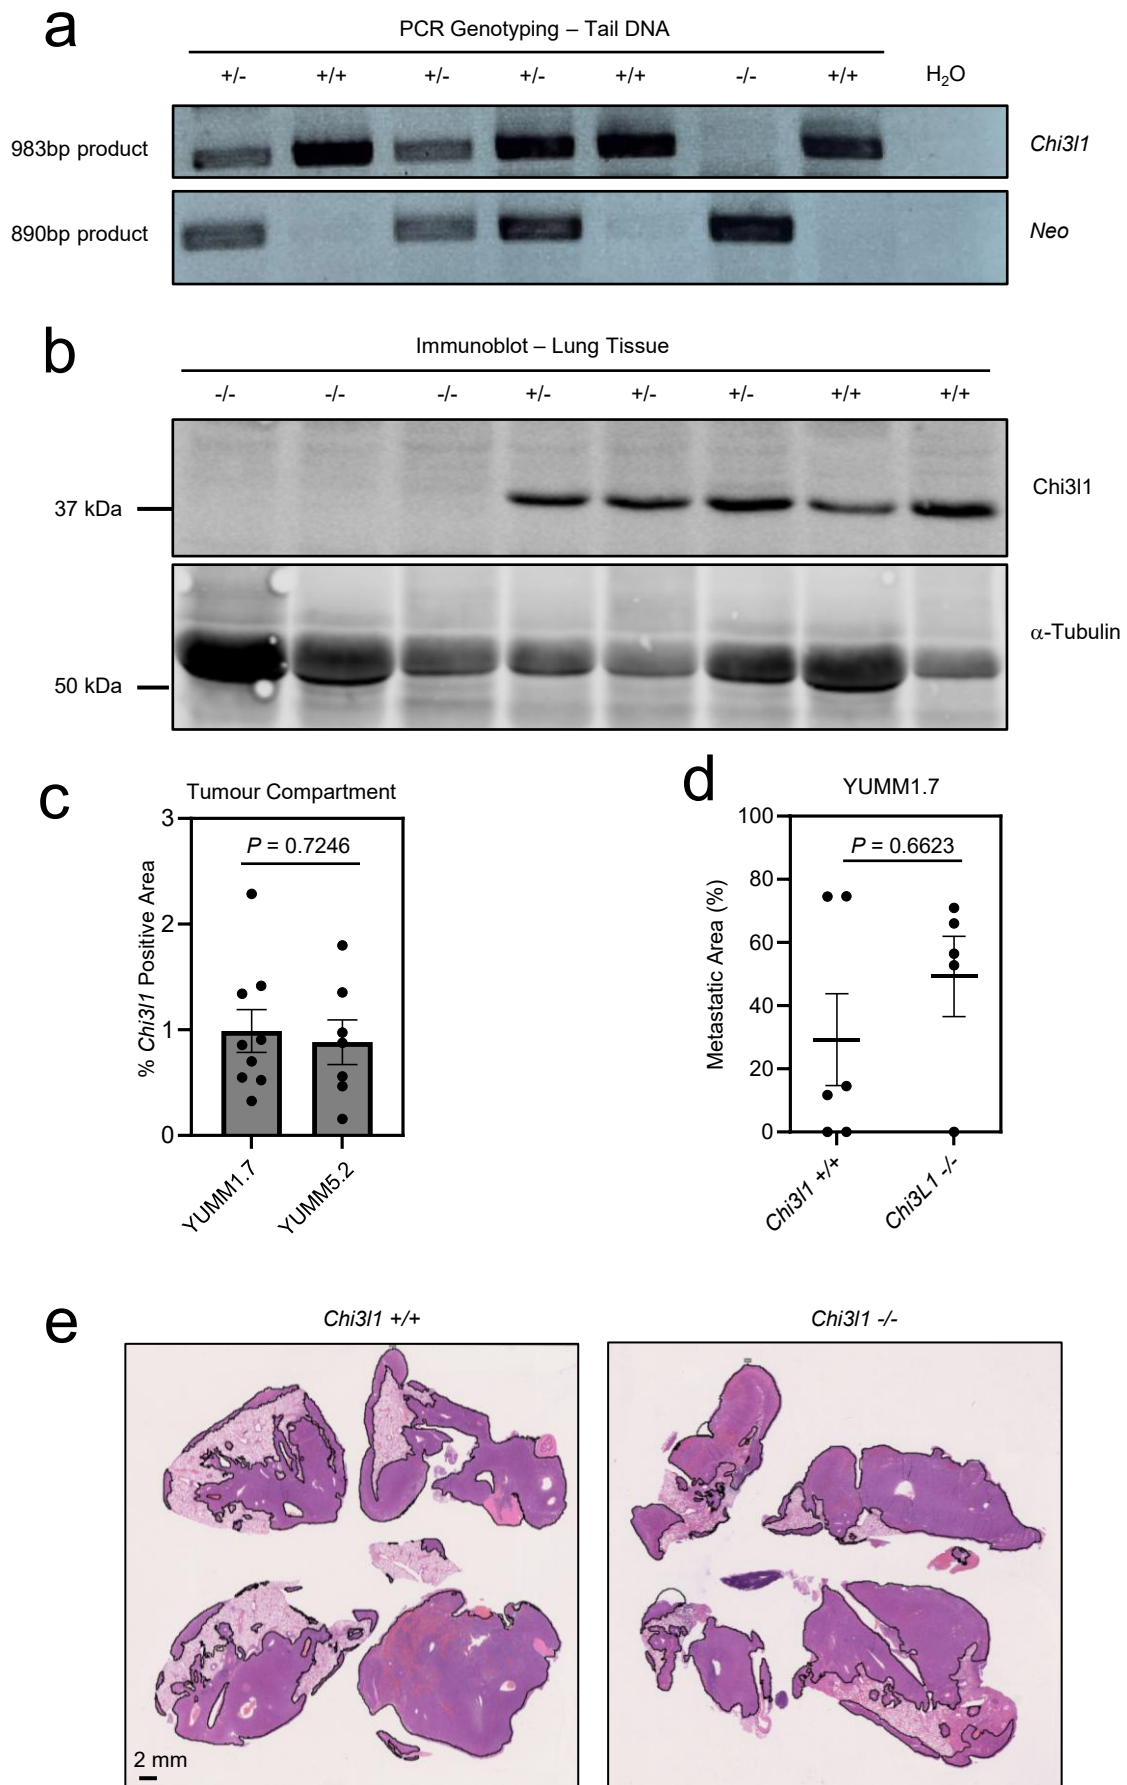

**Extended data Fig. 5. Characterization of transgenic mice lacking Chi3l1.** **a**, PCR genotyping of tail DNA from *Chi3l1* *+/+*, *+/-* and *-/-* mice. Primers were used to amplify *Chi3l1* or the neomycin cassette. Distilled water (H<sub>2</sub>O) was included as a negative control for primer contamination. **b**, Immunoblot analysis of lung tissue confirming the lack of *Chi3l1* expression in homozygous mutants (*-/-*) compared to heterozygous mutants (*+/-*) or wildtype mice (*+/+*).  $\alpha$ -Tubulin was used as a loading control. **c**, Quantification of RNAscope staining for *Chi3l1* in the tumour compartment of wildtype mice bearing intracranially injected YUMM1.7 or YUMM5.2 syngeneic melanoma cells. P-value was calculated using Student's *t*-test. **d**, Quantification of lung metastatic burden of *Chi3l1* *+/+* and *-/-* mice injected with YUMM1.7 cells into the lateral tail vein. P-value was calculated using a Mann-Whitney test. **e**, Representative H&E images of lungs corresponding to data in **(d)** are shown, with tumour burden annotated by solid black outlines.

**a**

YUMM1.7

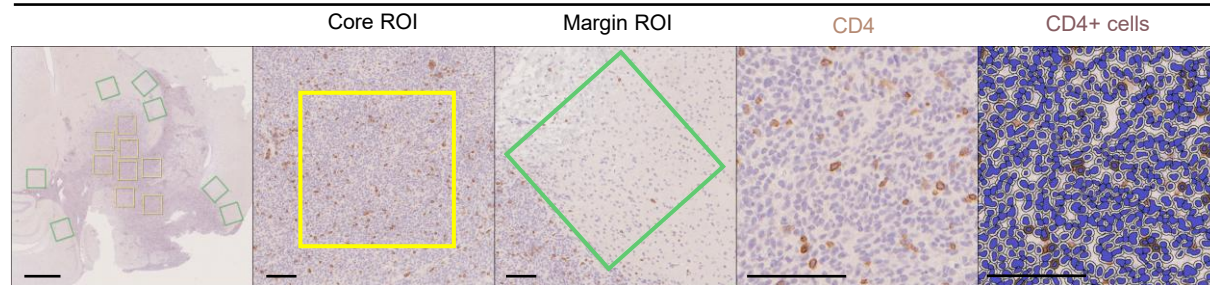**b**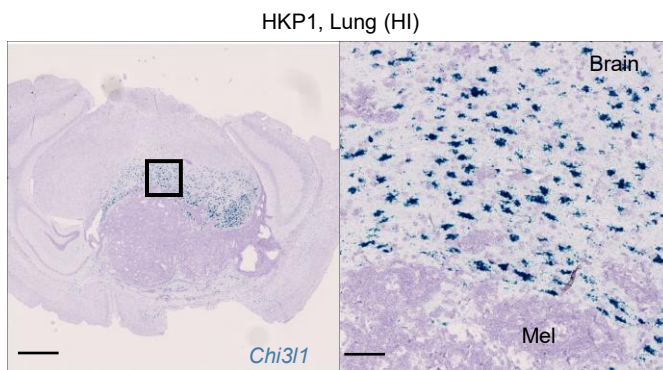**c**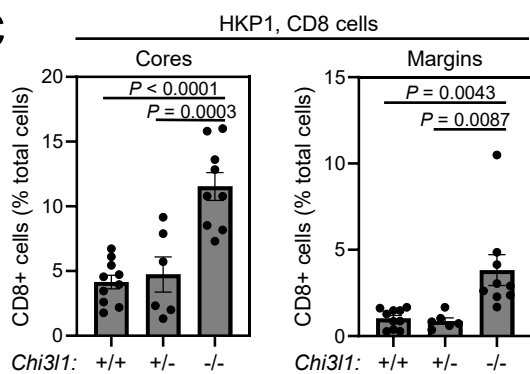**e**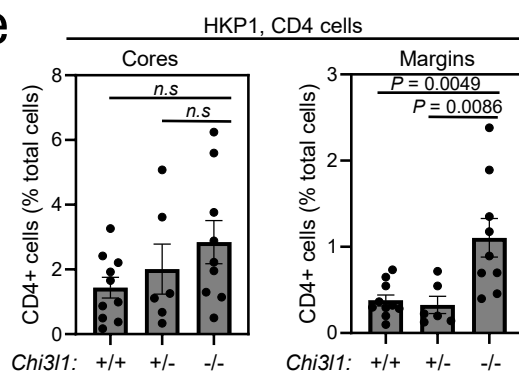**d**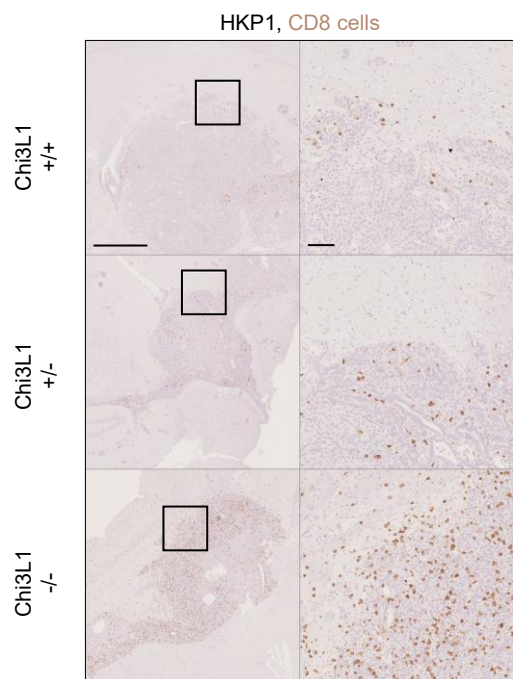**f**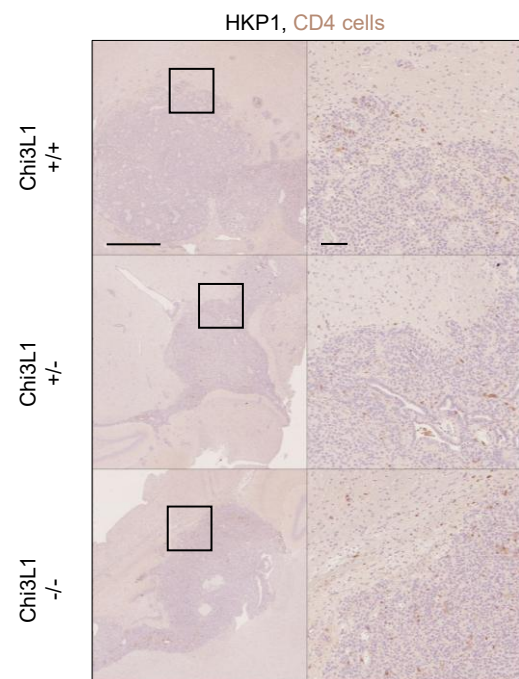

**g** Tumour Core (YUMM1.7)

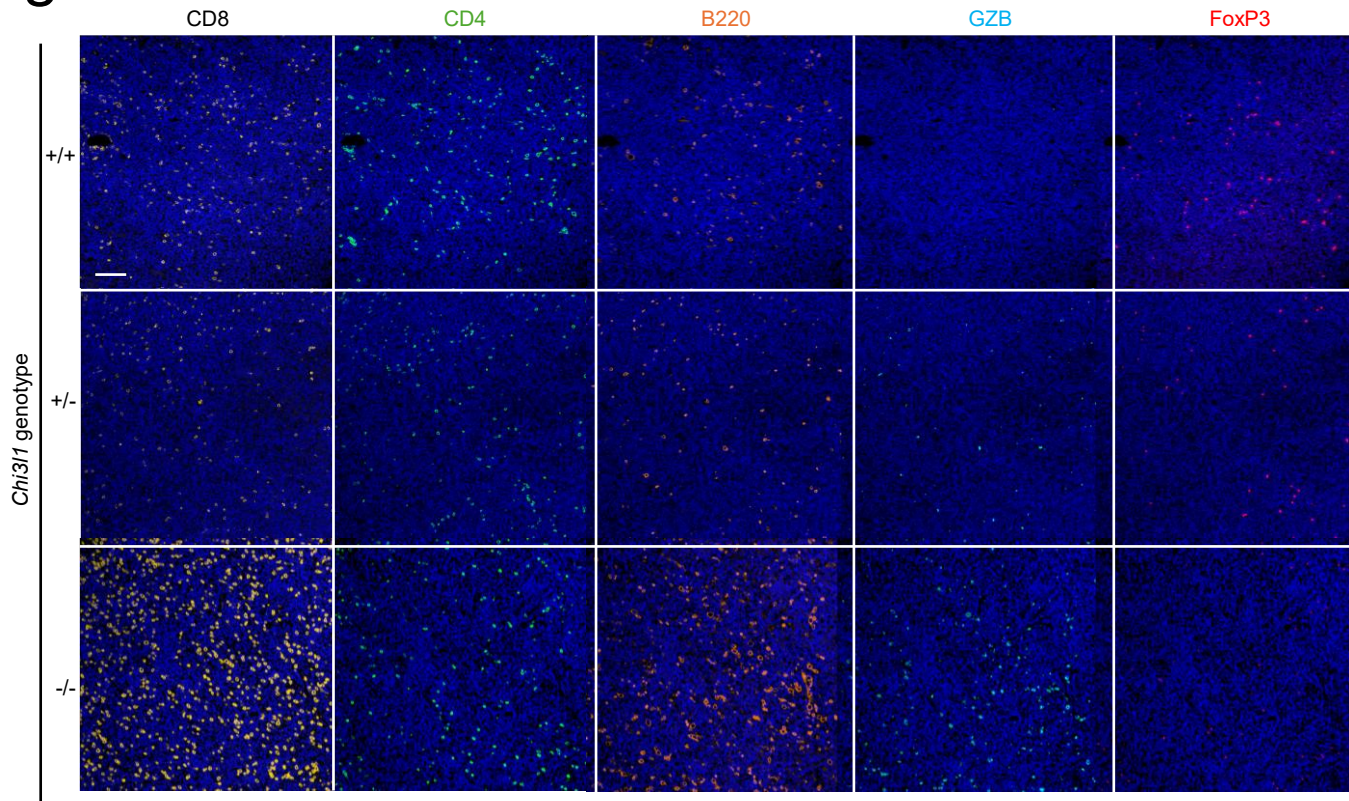

**h** Tumour Margin (YUMM1.7)

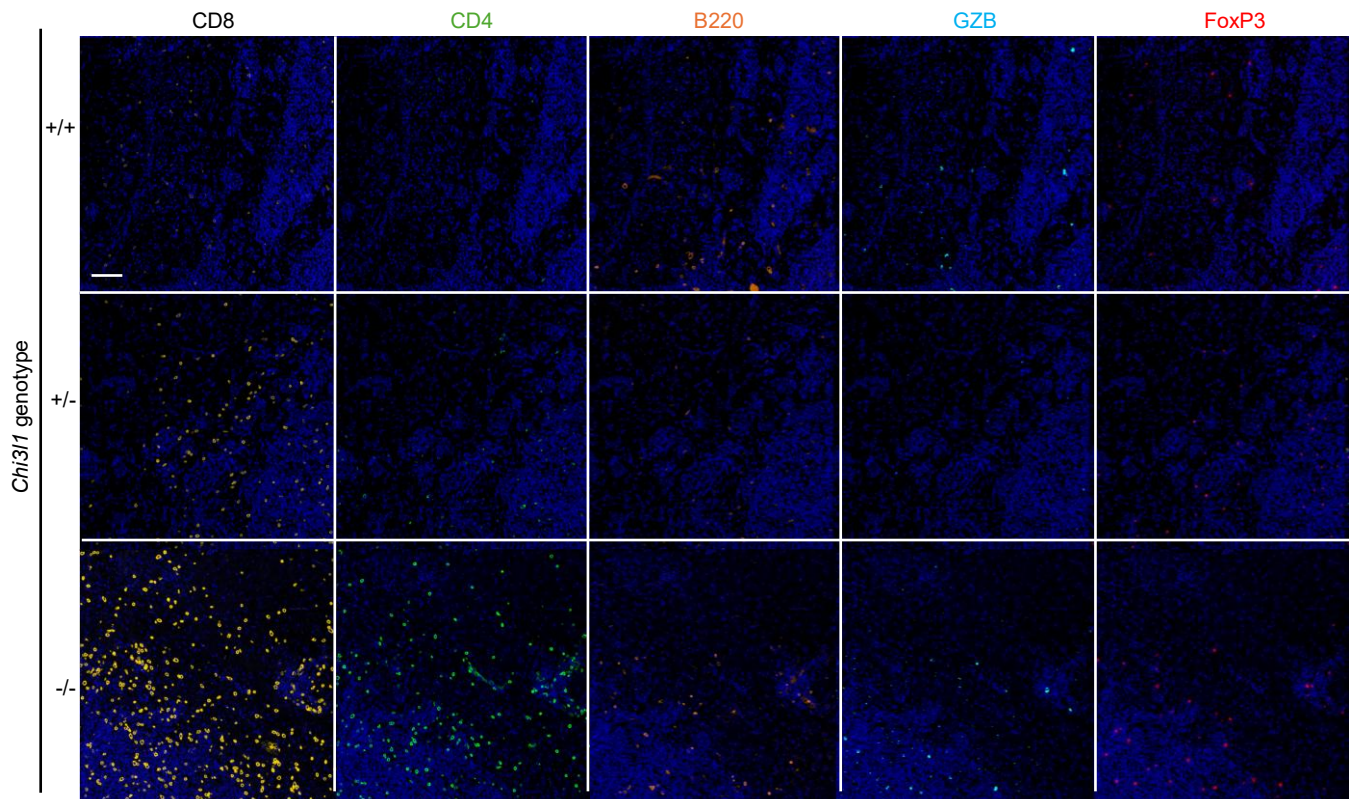

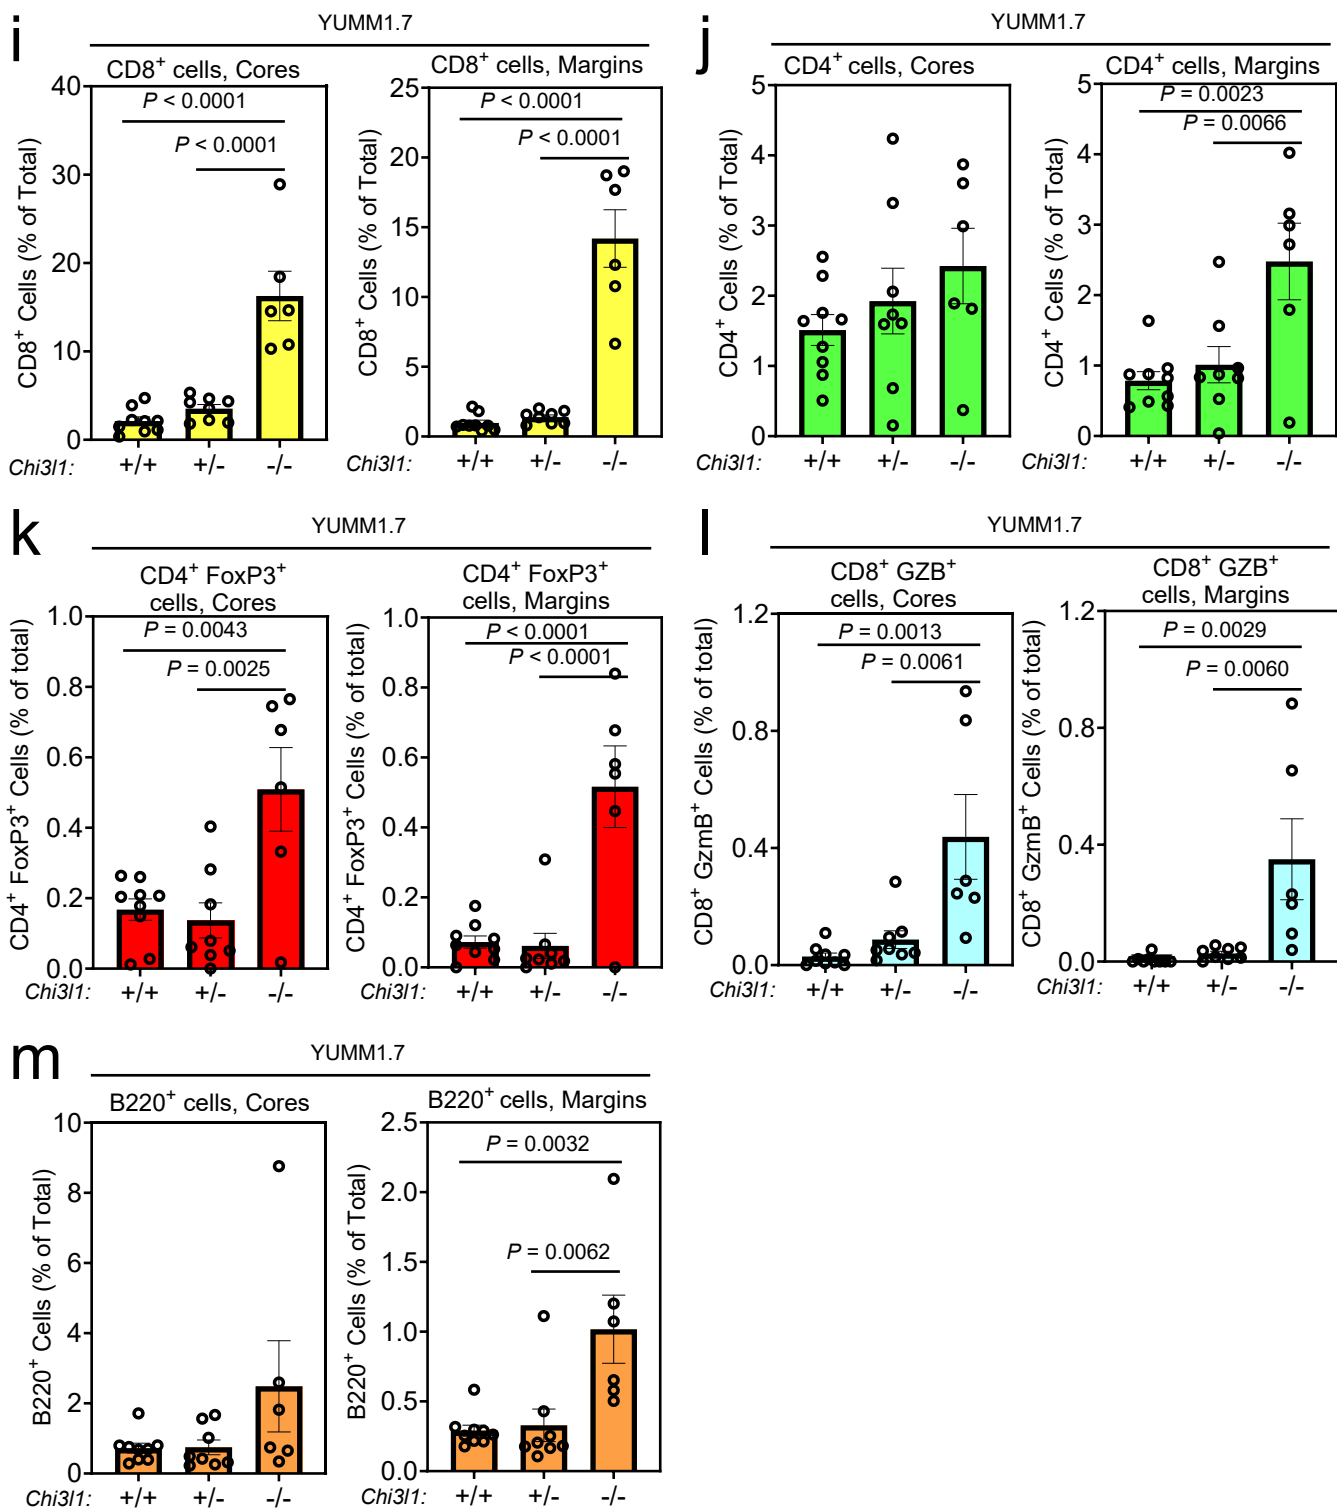

**Extended Data Fig. 6. IHC quantification methodology and immune characterization of highly invasive syngeneic brain metastasis models.** **a**, Representative annotated regions (cores, yellow; margins, green) for analysis of CD8 and CD4 immunohistochemical staining corresponding to Fig. 6a-d. CD4 staining is shown as an example of the staining-detection algorithm (*far right*). Scale bars: 1mm (*left*), 100  $\mu\text{m}$  (*others*). **b**, Representative RNAscope staining for *Chi3ll* (blue) in wildtype (WT) mouse brains bearing intracranially injected HKP1 cells (lung, HI). Scale bars: 1 mm (*left*), 100  $\mu\text{m}$  (*right*). **c**, Quantification of CD8<sup>+</sup> cells in the tumour cores (*left*) and margins (*right*) of *Chi3ll* +/+, +/- and -/- mice bearing intracranially injected HKP1 lung cancer cells. **d**, Representative images of immunohistochemical (IHC) staining for CD8 in HKP1-derived brain lesions. Scale bars: 1 mm (*upper left image*), 100  $\mu\text{m}$  (*upper right image*). **e**, Quantification of CD4<sup>+</sup> cells in the tumour cores (*left*) and margins (*right*) of *Chi3ll* +/+, +/- and -/- mice bearing intracranially injected HKP1 lung cancer cells. **f**, Representative images of immunohistochemical (IHC) staining for CD4 in HKP1-derived brain lesions. Scale bars: 1 mm (*upper left image*), 100  $\mu\text{m}$  (*upper right image*). **g, h**, Representative images of multiplex IHC staining for CD8 (yellow), CD4 (green), B220 (orange), granzyme B (GZB, blue) and FoxP3 (red) in brains of wildtype (+/+, *top*), heterozygous (+/-, *middle*) or homozygous *Chi3ll* knockout (-/-, *bottom*) mice bearing intracranially injected YUMM1.7 melanoma cells. Images were of tumour cores (**g**) or the tumour-brain margins (**h**). Scale bars: 100  $\mu\text{m}$ . **i-m**, Quantification of frequency (as a percentage of total cells) of CD8<sup>+</sup> (**i**), CD4<sup>+</sup> (**j**), CD4<sup>+</sup> FoxP3<sup>+</sup> (**k**), CD8<sup>+</sup> GZB<sup>+</sup> (**l**), B220<sup>+</sup> (**m**) cells, corresponding to images in panels C and D. P values were calculated by one way ANOVA tests. Non-significant values are not shown.
