# Supplementary material for: Distinct immune landscapes characterize highly versus minimally invasive brain metastases
Source: JCI journal article supplement (doi:10.1172/jci.insight.199498), 2026-05-22
Supplement: sd2 [file 2]

# Extended Data Figure 5A: full unedited gel

ladder 17360 17351 17356 17359 17352 17361 17369 (KO, father)  
WT (mother) H<sub>2</sub>O

Ch321 →

Neo →

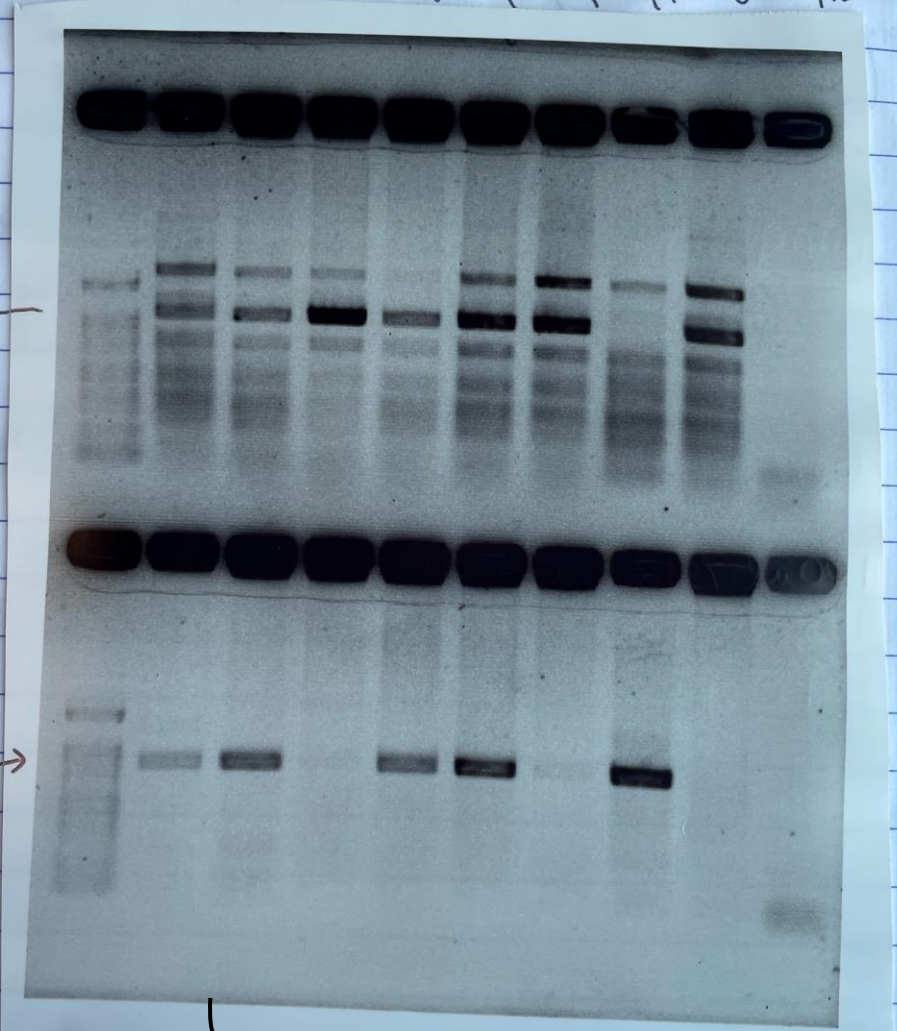

Lanes used in Figure

# Extended Data Figure 5B: CHI3L1; full unedited gel

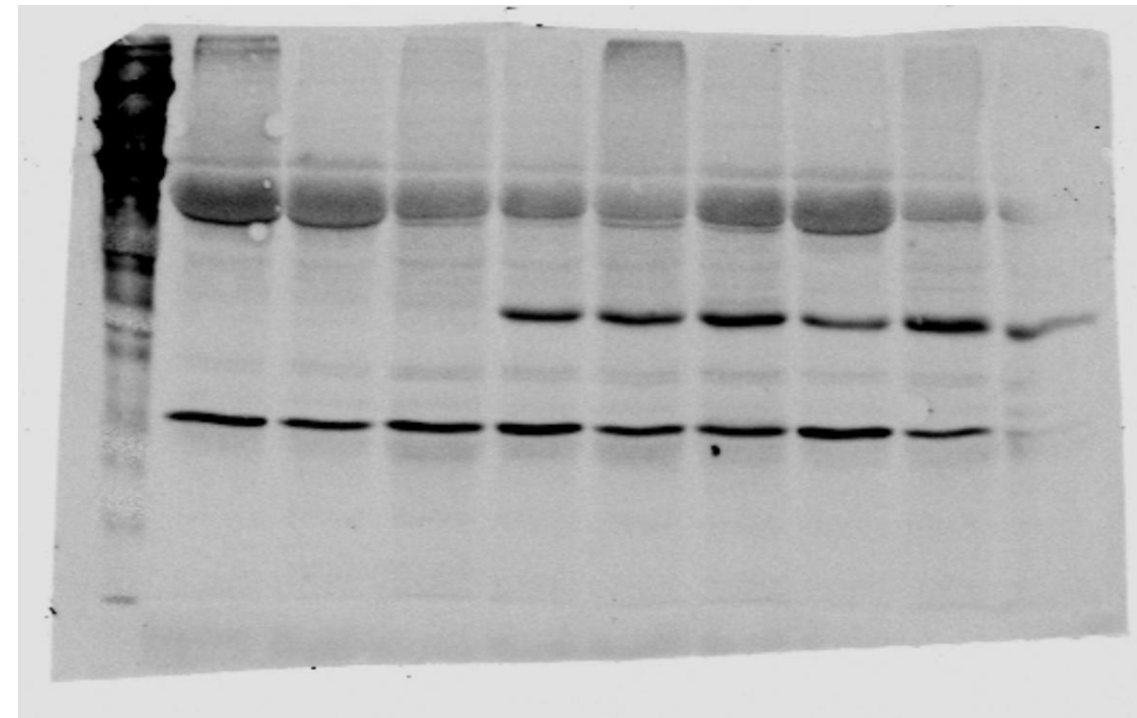

← Cropped to show bands at this level (CHI3L1)

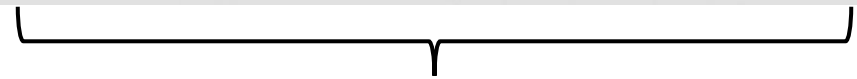

Lanes used in Figure

Immunoblot of lung tissue; antibody: Invitrogen, #81355, 1:500

# Extended Data Figure 5B: $\alpha$ -Tubulin; full unedited gel

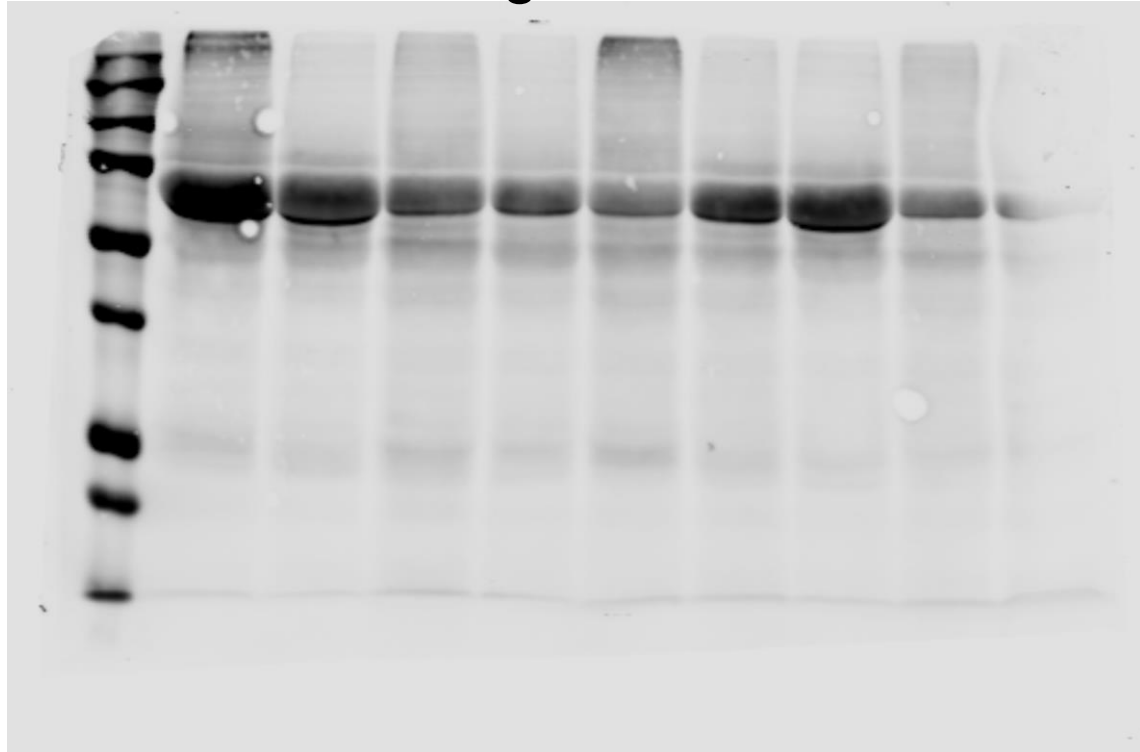

← Cropped to show bands at this level ( $\alpha$ -Tubulin)

Lanes used in Figure

Immunoblot of lung tissue; antibody: Sigma, #T9026, 1:10,000
